# Supplementary material for: Facile synthesis of 2-substituted benzo[b]furans and indoles by copper-catalyzed intramolecular cyclization of 2-alkynyl phenols and tosylanilines
Source: Royal Society of Chemistry journal article supplement (doi:10.1039/c9ra01260e), 2019-01-01

**Supporting Information for**

**Facile synthesis of 2-substituted benzo[*b*]furans and indoles by  
copper-catalyzed intramolecular cyclization of 2-alkynyl phenols and  
tosylanilines**

Zhouting Rong\*, Kexin Gao, Lei Zhou, Jianyuan Lin\* and Guoying Qian\*

*College of Biological and Environmental Sciences, Zhejiang Wanli University,  
Ningbo 315100, People's Republic of China.*

## Table of Contents

|                                                                                          |    |
|------------------------------------------------------------------------------------------|----|
| 1. General Methods.....                                                                  | 2  |
| 2. Procedure for the preparation of 2-alkynyl phenols and tosylanilines.....             | 2  |
| 3. Procedure for the synthesis of 2-substituted benzo[ <i>b</i> ]furans and indoles..... | 6  |
| 4. References.....                                                                       | 13 |
| 5. <sup>1</sup> H NMR and <sup>13</sup> C NMR Spectra.....                               | 13 |

## 1. General Methods.

All reactions were carried out in solvents dried using a Solvent Purification System (SPS). Thin layer chromatography was carried out using TLC aluminum sheets coated with 0.2 mm of silica gel (Merck Gf234). Chromatographic purifications were carried out using flash grade silica gel (SDS Chromatogel 60 ACC, 40-60  $\mu\text{m}$ ). NMR spectra were recorded at 23 °C on Bruker Avance 400 Ultrashield apparatus. Mass spectra were recorded on a Waters LCT Premier Spectrometer (ESI).

## 2. Procedure for the preparation of 2-alkynyl phenols and tosylanilines.

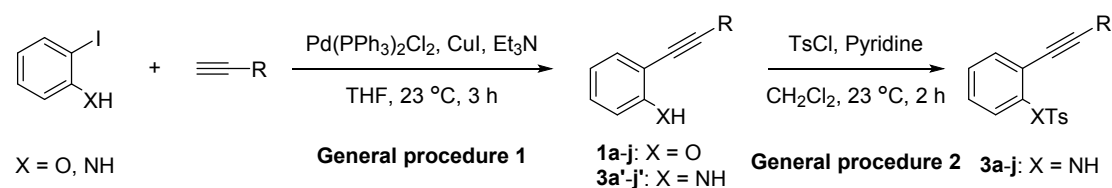

**General procedure 1:** Pd(PPh<sub>3</sub>)<sub>2</sub>Cl<sub>2</sub> (0.06 mmol), CuI (0.12 mmol) and Et<sub>3</sub>N (4.5 mmol) were added sequentially to a solution of 2-iodoaniline (or 2-iodophenol, 3 mmol) and corresponding alkyne (4.5 mmol) in THF (10 mL) at 23 °C and the mixture was stirred at this temperature for 3 h before the solvent was evaporated. The residue was purified by flash column chromatography (hexane/EtOAc) to give 2-alkynyl aniline (or 2-alkynyl phenol).

**General procedure 2:** To a solution of 2-alkynyl aniline (2 mmol) in CH<sub>2</sub>Cl<sub>2</sub> (4 mL) was added *p*-toluenesulfonyl chloride (2.4 mmol) and pyridine (8 mmol) at 23 °C and the mixture was stirred at 23 °C for 2 h before it was quenched with saturated aqueous NH<sub>4</sub>Cl (10 mL). The aqueous layer was extracted with CH<sub>2</sub>Cl<sub>2</sub> (5 mL) and the combined organic layer was washed sequentially with water (10 mL) and brine (10 mL), dried over anhydrous Na<sub>2</sub>SO<sub>4</sub>. The solvent was evaporated and the residue was purified by flash column chromatography (hexane/EtOAc) to give 2-alkynyl tosylaniline.

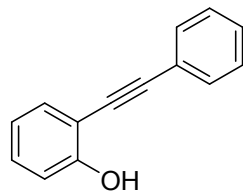

<sup>1</sup>H NMR (400 MHz, CDCl<sub>3</sub>)  $\delta$  7.58 - 7.50 (m, 2H), 7.46 - 7.42 (m, 1H), 7.39 - 7.35 (m, 3H), 7.32 - 7.28 (m, 1H), 7.02 - 6.98 (m, 1H), 6.92 (t, J = 7.6 Hz, 1H), 5.84 (br s, 1H). The data is in accordance with the literature.<sup>1</sup>

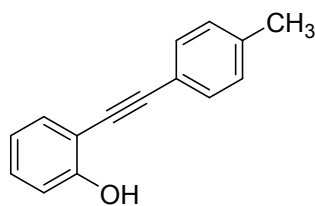

**$^1\text{H NMR}$**  (400 MHz,  $\text{CDCl}_3$ )  $\delta$  7.44 (m, 3H), 7.25 (m, 1H), 7.14 (d,  $J = 8.0$  Hz, 2H), 7.03 (d,  $J = 8.2$  Hz, 1H), 6.91 (m, 1H), 6.11 (br s, 1H), 2.35 (s, 3H). The data is in accordance with the literature.<sup>1</sup>

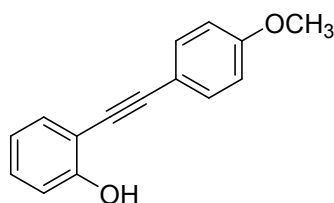

**$^1\text{H NMR}$**  (400 MHz,  $\text{CDCl}_3$ )  $\delta$  7.48 (m, 2H), 7.41 (dd,  $J = 7.7, 1.4$  Hz, 1H), 7.28 - 7.23 (m, 1H), 6.99 (d,  $J = 8.2$  Hz, 1H), 6.95 - 6.87 (m, 3H), 5.85 (br s, 1H), 3.85 (s, 3H). The data is in accordance with the literature.<sup>2</sup>

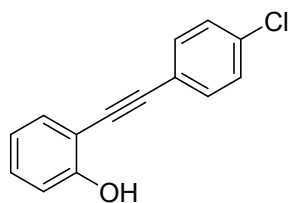

**$^1\text{H NMR}$**  (400 MHz,  $\text{CDCl}_3$ )  $\delta$  7.45 - 7.43 (m, 2H), 7.40 (dd,  $J = 7.6, 1.6$  Hz, 1H), 7.33 - 7.31 (m, 2H), 7.27 (ddd,  $J = 8.4, 7.6, 1.6$  Hz, 1H), 6.98 (dd,  $J = 8.4, 1.2$  Hz, 1H), 6.91 (td,  $J = 8.0, 1.2$  Hz, 1H), 5.82 (br s, 1H). The data is in accordance with the literature.<sup>3</sup>

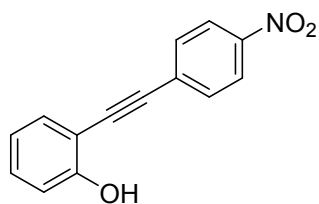

**$^1\text{H NMR}$**  (400 MHz,  $\text{CDCl}_3$ )  $\delta$  8.24 (d,  $J = 8.4$  Hz, 2H), 7.69 (d,  $J = 8.4$  Hz, 2H), 7.45 (d,  $J = 7.7$  Hz, 1H), 7.33 (t,  $J = 7.8$  Hz, 1H), 7.04 - 6.89 (m, 2H), 5.72 (br s, 1H). The data is in accordance with the literature.<sup>4</sup>

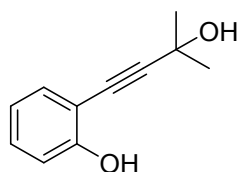

**<sup>1</sup>H NMR** (400 MHz, CDCl<sub>3</sub>) δ 7.30 (dd, J = 7.6, 1.6 Hz, 1H), 7.26 - 7.22 (m, 1H), 6.95 - 6.93 (m, 1H), 6.85 (dt, J = 7.6, 1.2 Hz, 1H), 6.11 (br s, 1H), 2.48 (br s, 1H), 1.66 (s, 6H). The data is in accordance with the literature.<sup>5</sup>

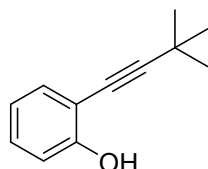

**<sup>1</sup>H NMR** (400 MHz, CDCl<sub>3</sub>) δ 7.27 (d, J = 7.6 Hz, 1H), 7.17 (m, 1H), 6.91 (d, J = 8.4 Hz, 1H), 6.82 (m, 1H), 5.78 (br s, 1H), 1.34 (s, 9H). The data is in accordance with the literature.<sup>6</sup>

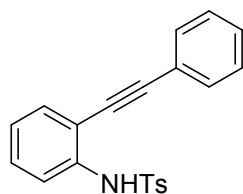

**<sup>1</sup>H NMR** (400 MHz, CDCl<sub>3</sub>) δ 7.68 (d, J = 8.3 Hz, 2H), 7.63 (d, J = 8.3 Hz, 1H), 7.49 - 7.45 (m, 2H), 7.42 - 7.36 (m, 4H), 7.32 - 7.27 (m, 1H), 7.20 (br s, 1H), 7.17 (d, J = 8.2 Hz, 2H), 7.07 (t, J = 7.6 Hz, 1H), 2.34 (s, 3H). The data is in accordance with the literature.<sup>7</sup>

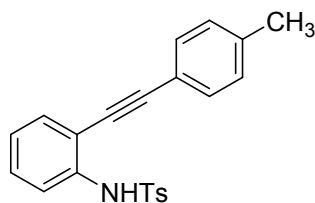

**<sup>1</sup>H NMR** (400 MHz, CDCl<sub>3</sub>) δ 7.66 (d, J = 8.0 Hz, 2H), 7.62 (d, J = 8.0 Hz, 1H), 7.37 - 7.33 (m, 3H), 7.28 - 7.25 (m, 2H), 7.18 - 7.13 (m, 4H), 7.04 (td, J = 7.6, 0.8 Hz, 1H), 2.38 (s, 3H), 2.31 (s, 3H). The data is in accordance with the literature.<sup>8</sup>

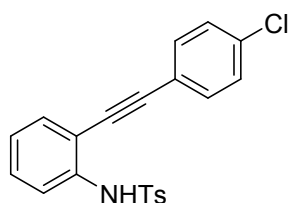

**<sup>1</sup>H NMR** (400 MHz, CDCl<sub>3</sub>) δ 7.68 - 7.65 (m, 2H), 7.61 (d, J = 8.2 Hz, 1H), 7.39 - 7.33 (m, 5H), 7.29 (td, J = 7.8, 1.6 Hz, 1H), 7.20 (bs, 1H), 7.16 (d, J = 8.0 Hz, 2H), 7.06 (td, J = 1.2, 7.6 Hz, 1H), 2.33 (s, 3H). The data is in accordance with the literature.<sup>8</sup>

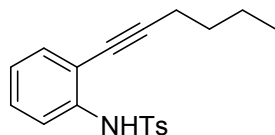

**<sup>1</sup>H NMR** (400 MHz, CDCl<sub>3</sub>) δ 7.66 (d, J = 7.6 Hz, 2H), 7.57 (d, J = 8.4 Hz, 1H), 7.28 (bs, 1H), 7.22 - 7.17 (m, 4H), 6.96 (t, J = 8.0 Hz, 1H), 2.40 (t, J = 7.2 Hz, 2H), 2.33 (s, 3H), 1.60 - 1.54 (m, 2H), 1.50 - 1.40 (m, 2H), 0.96 (t, J = 7.6 Hz, 3H). The data is in accordance with the literature.<sup>8</sup>

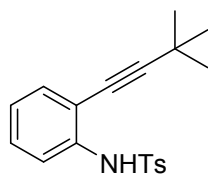

**<sup>1</sup>H NMR** (400 MHz, CDCl<sub>3</sub>) δ 7.64 (d, J = 8.3 Hz, 2H), 7.58 (d, J = 8.3 Hz, 1H), 7.26 - 7.19 (m, 4H), 7.11 (br, 1H), 6.98 (t, J = 8.3 Hz, 1H), 2.36 (s, 3H), 1.32 (s, 9H). The data is in accordance with the literature.<sup>9</sup>

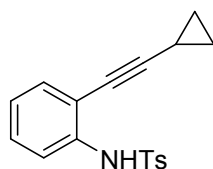

**<sup>1</sup>H NMR** (400 MHz, CDCl<sub>3</sub>) δ 7.65 (d, J = 8.4 Hz, 2H), 7.54 (d, J = 7.6 Hz, 1H), 7.26 - 7.19 (m, 5H), 6.97 (t, J = 7.6 Hz, 1H), 2.37 (s, 3H), 1.46 - 1.43 (m, 1H), 0.95 - 0.91 (m, 2H), 0.77 - 0.74 (m, 2H). The data is in accordance with the literature.<sup>8</sup>

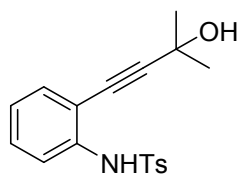

**<sup>1</sup>H NMR** (400 MHz, CDCl<sub>3</sub>) δ 8.04 (d, J = 8.4 Hz, 1H), 7.73 (d, J = 8.3 Hz, 2H), 7.41 (d, J = 7.7 Hz, 1H), 7.24 (t, J = 7.8 Hz, 1H), 7.16 (t, J = 7.4 Hz, 1H), 7.09 (d, J = 8.3 Hz, 2H), 6.73 (s, 1H), 4.98 (br s, 1H), 2.22 (s, 3H), 1.88 (s, 6H). The data is in accordance with the literature.<sup>10</sup>

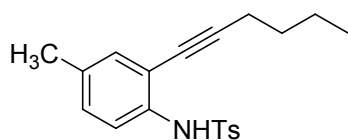

**<sup>1</sup>H NMR** (400 MHz, CDCl<sub>3</sub>) δ 7.63 (d, J = 8.4 Hz, 2H), 7.46 (d, J = 8.4 Hz, 1H), 7.18 (d, J = 7.6 Hz, 2H), 7.08 - 7.00 (m, 3H), 2.40 - 2.36 (m, 5H), 2.21 (s, 3H), 1.59 - 1.53 (m, 2H), 1.49 - 1.41 (m, 2H), 0.96 (t, J = 7.2 Hz, 3H). The data is in accordance with the literature.<sup>11</sup>

### 3. Procedure for the synthesis of 2-substituted benzo[*b*]furans and indoles

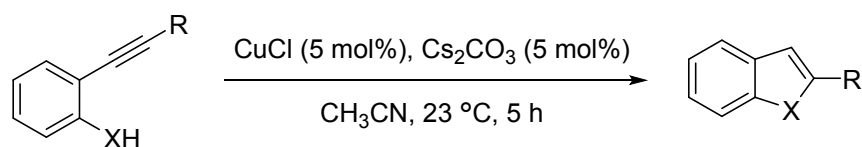

X = O, NTs  
R = aliphatic or aromatic group

CuCl (2.5 mg, 0.025 mmol) and Cs<sub>2</sub>CO<sub>3</sub> (8.1 mg, 0.025 mmol) were added to a solution of 2-alkynyl phenol (or 2-alkynyl tosylaniline, 0.5 mmol) in CH<sub>3</sub>CN (2 mL) and the mixture was stirred at 23 °C for 5 h. Then Et<sub>2</sub>O (10 mL) was added and the resulting mixture was washed sequentially with water (10 mL) and brine (10 mL), dried over anhydrous Na<sub>2</sub>SO<sub>4</sub>. The solvent was evaporated and the residue was purified by flash column chromatography (hexane/EtOAc) to give 2-substituted benzo[*b*]furans (or 2-substituted indoles).

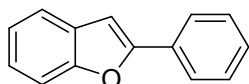

Yield: 95%.

**<sup>1</sup>H NMR** (400 MHz, CDCl<sub>3</sub>) δ 7.95 - 7.90 (m, 2H), 7.66 - 7.57 (m, 2H), 7.50 (t, J = 7.6 Hz, 2H), 7.44 - 7.25 (m, 3H), 7.08 - 7.05 (m, 1H).

**<sup>13</sup>C NMR** (101 MHz, CDCl<sub>3</sub>) δ 155.99, 154.97, 130.55, 129.30, 128.83, 128.59, 125.00, 124.32, 123.00, 120.97, 111.24, 101.38.

**HRMS-ESI** calculated for C<sub>14</sub>H<sub>11</sub>O [M+H]<sup>+</sup>: 195.0810; found: 195.0814.

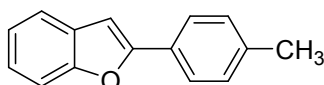

Yield: 90%.

**<sup>1</sup>H NMR** (400 MHz, CDCl<sub>3</sub>) δ 7.88 (d, J = 8.1 Hz, 2H), 7.70 - 7.62 (m, 2H), 7.43 - 7.31 (m, 4H), 7.06 (s, 1H), 2.51 (s, 3H).

**<sup>13</sup>C NMR** (101 MHz, CDCl<sub>3</sub>) δ 156.27, 154.86, 138.62, 129.54, 129.44, 127.83, 124.96, 124.06, 122.92, 120.81, 111.16, 100.63, 21.43.

**HRMS-ESI** calculated for C<sub>15</sub>H<sub>13</sub>O [M+H]<sup>+</sup>: 209.0966; found: 209.0962.

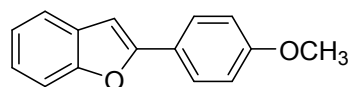

Yield: 89%.

**<sup>1</sup>H NMR** (400 MHz, CDCl<sub>3</sub>) δ 7.85 - 7.77 (m, 2H), 7.59 - 7.48 (m, 2H), 7.24 (dtd, J = 16.1, 7.3, 1.4 Hz, 2H), 7.02 - 6.95 (m, 2H), 6.90 (d, J = 1.0 Hz, 1H), 3.87 (s, 3H).

**<sup>13</sup>C NMR** (101 MHz, CDCl<sub>3</sub>) δ 160.00, 156.07, 154.71, 129.50, 126.43, 123.74, 123.37, 122.83, 120.57, 114.27, 110.99, 99.68, 55.37.

**HRMS-ESI** calculated for C<sub>15</sub>H<sub>13</sub>O<sub>2</sub> [M+H]<sup>+</sup>: 225.0916; found: 225.0920.

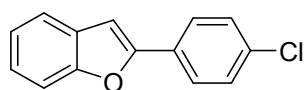

Yield: 93%.

**<sup>1</sup>H NMR** (400 MHz, CDCl<sub>3</sub>) δ 7.76 - 7.71 (m, 2H), 7.56 - 7.51 (m, 1H), 7.47 (d, J = 8.1 Hz, 1H), 7.39 - 7.34 (m, 2H), 7.26 (ddd, J = 8.2, 7.2, 1.5 Hz, 1H), 7.23 - 7.17 (m, 1H), 6.95 (d, J = 1.0 Hz, 1H).

**<sup>13</sup>C NMR** (101 MHz, CDCl<sub>3</sub>) δ 154.91, 154.77, 134.32, 129.07, 129.04, 128.98, 126.13, 124.57, 123.11, 121.02, 111.21, 101.76.

**HRMS-ESI** calculated for C<sub>14</sub>H<sub>10</sub>ClO [M+H]<sup>+</sup>: 229.0420; found: 229.0426.

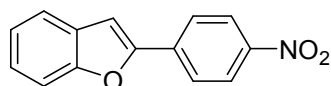

Yield: 77%.

**<sup>1</sup>H NMR** (400 MHz, CDCl<sub>3</sub>) δ 8.32 - 8.27 (m, 2H), 8.01 - 7.97 (m, 2H), 7.65 - 7.61 (m, 1H), 7.57 - 7.52 (m, 1H), 7.36 (ddd, J = 8.4, 7.2, 1.4 Hz, 1H), 7.30 - 7.21 (m, 2H).



**<sup>13</sup>C NMR** (101 MHz, CDCl<sub>3</sub>) δ 155.44, 153.24, 147.25, 136.27, 128.64, 125.82, 125.21, 124.30, 123.54, 121.63, 111.49, 105.10.

**HRMS-ESI** calculated for C<sub>14</sub>H<sub>10</sub>NO<sub>3</sub> [M+H]<sup>+</sup>: 240.0661; found: 240.0666.

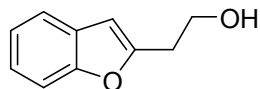

Yield: 83%.

**<sup>1</sup>H NMR** (400 MHz, CDCl<sub>3</sub>) δ 7.50 - 7.43 (m, 1H), 7.42 - 7.36 (m, 1H), 7.23 - 7.12 (m, 2H), 6.44 (d, J = 1.2 Hz, 1H), 3.89 (t, J = 6.3 Hz, 2H), 3.00 - 2.91 (m, 2H), 2.31 (s, 1H).

**<sup>13</sup>C NMR** (101 MHz, CDCl<sub>3</sub>) δ 156.04, 154.82, 128.76, 123.54, 122.66, 120.46, 110.88, 103.62, 60.61, 32.03.

**HRMS-ESI** calculated for C<sub>10</sub>H<sub>10</sub>NaO<sub>2</sub> [M+Na]<sup>+</sup>: 185.0578; found: 185.0572.

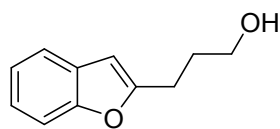

Yield: 86%.

**<sup>1</sup>H NMR** (400 MHz, CDCl<sub>3</sub>) δ 7.50 - 7.44 (m, 1H), 7.42 - 7.37 (m, 1H), 7.22 - 7.14 (m, 2H), 6.39 (q, J = 1.1 Hz, 1H), 3.71 (t, J = 6.3 Hz, 2H), 2.86 (td, J = 7.5, 0.9 Hz, 2H), 1.99 (tt, J = 7.5, 6.3 Hz, 2H), 1.87 (br s, 1H).

**<sup>13</sup>C NMR** (101 MHz, CDCl<sub>3</sub>) δ 158.75, 154.69, 128.90, 123.26, 122.51, 120.29, 110.77, 102.24, 61.90, 30.62, 24.81.

**HRMS-ESI** calculated for C<sub>11</sub>H<sub>12</sub>NaO<sub>2</sub> [M+Na]<sup>+</sup>: 199.0735; found: 199.0739.

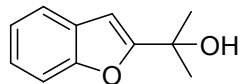

Yield: 81%.

**<sup>1</sup>H NMR** (400 MHz, CDCl<sub>3</sub>) δ 7.47 (dd, J = 7.5, 1.5 Hz, 1H), 7.40 (d, J = 8.0 Hz, 1H), 7.24 - 7.12 (m, 2H), 6.52 (s, 1H), 2.18 (br s, 1H), 1.62 (s, 6H).

**<sup>13</sup>C NMR** (101 MHz, CDCl<sub>3</sub>) δ 163.03, 154.68, 128.32, 123.99, 122.72, 120.99, 111.18, 100.34, 69.33, 28.76.

**HRMS-ESI** calculated for  $C_{11}H_{12}NaO_2$   $[M+Na]^+$ : 199.0735; found: 199.0739.

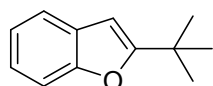

Yield: 91%.

**$^1H$  NMR** (400 MHz,  $CDCl_3$ )  $\delta$  7.47 - 7.41 (m, 1H), 7.38 (d,  $J = 7.8$  Hz, 1H), 7.21 - 7.08 (m, 2H), 6.31 (s, 1H), 1.34 (s, 9H).

**$^{13}C$  NMR** (101 MHz,  $CDCl_3$ )  $\delta$  167.40, 154.61, 128.92, 123.06, 122.28, 120.33, 110.79, 98.90, 32.97, 28.87.

**HRMS-ESI** calculated for  $C_{12}H_{15}O$   $[M+H]^+$ : 175.1123; found: 175.1129.

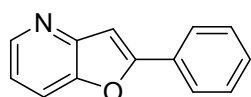

Yield: 88%.

**$^1H$  NMR** (400 MHz,  $CDCl_3$ )  $\delta$  8.44 (d,  $J = 4.8$  Hz, 1H), 7.81 (d,  $J = 7.4$  Hz, 2H), 7.67 - 7.63 (m, 1H), 7.38 (t,  $J = 7.5$  Hz, 2H), 7.34 - 7.29 (m, 1H), 7.13 (s, 1H), 7.09 (dd,  $J = 8.3, 4.8$  Hz, 1H).

**$^{13}C$  NMR** (101 MHz,  $CDCl_3$ )  $\delta$  159.58, 149.04, 147.97, 146.03, 129.69, 129.52, 128.89, 125.29, 118.75, 117.72, 102.41.

**HRMS-ESI** calculated for  $C_{13}H_{10}NO$   $[M+H]^+$ : 196.0762; found: 196.0766.

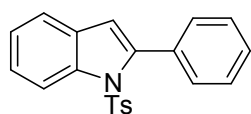

Yield: 95%.

**$^1H$  NMR** (400 MHz,  $CDCl_3$ )  $\delta$  8.38 (d,  $J = 8.4$  Hz, 1H), 7.57 (dd,  $J = 7.2, 2.5$  Hz, 2H), 7.53 - 7.48 (m, 4H), 7.42 (ddd,  $J = 8.5, 7.2, 1.4$  Hz, 1H), 7.36 - 7.30 (m, 3H), 7.10 (d,  $J = 8.1$  Hz, 2H), 6.61 (s, 1H), 2.35 (s, 3H).

**$^{13}C$  NMR** (101 MHz,  $CDCl_3$ )  $\delta$  144.50, 142.14, 138.30, 134.73, 132.43, 130.55, 130.34, 129.18, 128.63, 127.48, 126.80, 124.76, 124.29, 120.68, 116.66, 113.58, 21.51.

**HRMS-ESI** calculated for  $C_{21}H_{18}NO_2S$   $[M+H]^+$ : 348.1058; found: 348.1051.

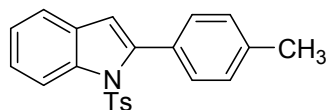

Yield: 91%.

**<sup>1</sup>H NMR** (400 MHz, CDCl<sub>3</sub>) δ 8.31 (d, J = 8.4 Hz, 1H), 7.42 (t, J = 7.7 Hz, 3H), 7.34 (ddd, J = 8.5, 7.2, 1.4 Hz, 1H), 7.30 - 7.22 (m, 5H), 7.04 (d, J = 8.1 Hz, 2H), 6.51 (s, 1H), 2.45 (s, 3H), 2.28 (s, 3H).

**<sup>13</sup>C NMR** (101 MHz, CDCl<sub>3</sub>) δ 144.46, 142.31, 138.61, 138.22, 134.65, 130.67, 130.20, 129.56, 129.17, 128.26, 126.80, 124.62, 124.28, 120.59, 116.68, 113.30, 21.53, 21.46.

**HRMS-ESI** calculated for C<sub>22</sub>H<sub>20</sub>NO<sub>2</sub>S [M+H]<sup>+</sup>: 362.1215; found: 362.1219.

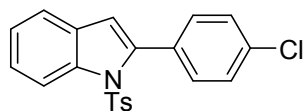

Yield: 94%.

**<sup>1</sup>H NMR** (400 MHz, CDCl<sub>3</sub>) δ 8.33 (d, J = 8.4 Hz, 1H), 7.47 - 7.43 (m, 3H), 7.42 - 7.35 (m, 3H), 7.30 - 7.25 (m, 3H), 7.04 (d, J = 8.1 Hz, 2H), 6.55 (s, 1H), 2.28 (s, 3H).

**<sup>13</sup>C NMR** (101 MHz, CDCl<sub>3</sub>) δ 144.76, 140.83, 138.37, 134.76, 134.49, 131.50, 130.92, 130.47, 129.30, 127.83, 126.72, 125.08, 124.51, 120.85, 116.70, 114.08, 21.54.

**HRMS-ESI** calculated for C<sub>21</sub>H<sub>17</sub>ClNO<sub>2</sub>S [M+H]<sup>+</sup>: 382.0669; found: 382.0665.

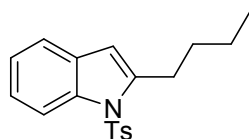

Yield: 88%.

**<sup>1</sup>H NMR** (400 MHz, CDCl<sub>3</sub>) δ 8.19 (d, J = 8.2 Hz, 1H), 7.64 (d, J = 8.3 Hz, 2H), 7.45 - 7.40 (m, 1H), 7.29 - 7.17 (m, 4H), 6.40 (s, 1H), 3.05 - 2.95 (m, 2H), 2.35 (s, 3H), 1.75 (p, J = 7.6 Hz, 2H), 1.46 (h, J = 7.4 Hz, 2H), 0.98 (t, J = 7.3 Hz, 3H).

**<sup>13</sup>C NMR** (101 MHz, CDCl<sub>3</sub>) δ 144.55, 142.52, 137.20, 136.26, 129.85, 129.75, 126.25, 123.74, 123.42, 120.01, 114.82, 108.59, 30.98, 28.74, 22.48, 21.54, 13.93.

**HRMS-ESI** calculated for C<sub>19</sub>H<sub>22</sub>NO<sub>2</sub>S [M+H]<sup>+</sup>: 328.1371; found: 328.1376.

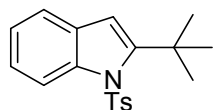

Yield: 88%.

**<sup>1</sup>H NMR** (400 MHz, CDCl<sub>3</sub>) δ 8.05 - 8.01 (m, 1H), 7.47 - 7.37 (m, 3H), 7.21 - 7.13 (m, 2H), 7.10 (d, J = 8.2 Hz, 2H), 6.61 (s, 1H), 2.28 (s, 3H), 1.60 (s, 9H).

**<sup>13</sup>C NMR** (101 MHz, CDCl<sub>3</sub>) δ 152.75, 144.03, 138.95, 136.84, 129.47, 129.24, 126.00, 124.14, 123.62, 120.30, 116.10, 110.76, 35.02, 31.37, 21.48.

**HRMS-ESI** calculated for C<sub>19</sub>H<sub>22</sub>NO<sub>2</sub>S [M+H]<sup>+</sup>: 328.1371; found: 328.1377.

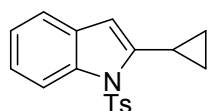

Yield: 85%.

**<sup>1</sup>H NMR** (400 MHz, CDCl<sub>3</sub>) δ 8.24 (d, J = 8.4 Hz, 1H), 7.75 - 7.70 (m, 2H), 7.41 - 7.37 (m, 1H), 7.28 (ddd, J = 8.4, 7.2, 1.4 Hz, 1H), 7.23 - 7.17 (m, 3H), 6.19 (s, 1H), 2.46 (dddd, J = 11.5, 8.4, 5.3, 1.2 Hz, 1H), 2.34 (s, 3H), 1.01 - 0.94 (m, 2H), 0.63 - 0.57 (m, 2H).

**<sup>13</sup>C NMR** (101 MHz, CDCl<sub>3</sub>) δ 144.62, 144.12, 137.40, 136.58, 129.67, 129.33, 126.60, 123.88, 123.39, 120.21, 114.50, 106.06, 21.56, 9.47, 8.44.

**HRMS-ESI** calculated for C<sub>18</sub>H<sub>18</sub>NO<sub>2</sub>S [M+H]<sup>+</sup>: 312.1058; found: 312.1055.

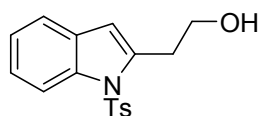

Yield: 90%.

**<sup>1</sup>H NMR** (400 MHz, CDCl<sub>3</sub>) δ 8.19 - 8.12 (m, 1H), 7.64 - 7.55 (m, 2H), 7.44 - 7.35 (m, 1H), 7.25 (ddd, J = 8.5, 7.2, 1.4 Hz, 1H), 7.19 (td, J = 7.4, 1.1 Hz, 1H), 7.13 (d, J = 8.1 Hz, 2H), 6.51 - 6.43 (m, 1H), 3.98 (t, J = 6.4 Hz, 2H), 3.31 - 3.22 (m, 2H), 2.66 (br s, 1H), 2.28 (s, 3H).

**<sup>13</sup>C NMR** (101 MHz, CDCl<sub>3</sub>) δ 144.88, 138.21, 137.24, 135.85, 129.88, 129.73, 126.23, 124.19, 123.69, 120.35, 114.88, 110.57, 61.69, 32.55, 21.53.

**HRMS-ESI** calculated for C<sub>17</sub>H<sub>17</sub>NNaO<sub>3</sub>S [M+Na]<sup>+</sup>: 338.0827; found: 338.0824.

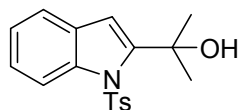

Yield: 90%.

**<sup>1</sup>H NMR** (400 MHz, CDCl<sub>3</sub>) δ 7.93 (d, J = 8.3 Hz, 1H), 7.65 (d, J = 8.1 Hz, 2H), 7.34 (d, J = 7.5 Hz, 1H), 7.14 (dq, J = 23.6, 7.3 Hz, 2H), 7.06 (d, J = 8.1 Hz, 2H), 6.64 (s, 1H), 4.98 (br s, 1H), 2.20 (s, 3H), 1.78 (s, 6H).

**<sup>13</sup>C NMR** (101 MHz, CDCl<sub>3</sub>) δ 148.39, 144.81, 138.06, 134.99, 129.63, 129.06, 126.59, 125.01, 124.04, 121.08, 115.56, 111.24, 69.34, 31.08, 21.51.

**HRMS-ESI** calculated for C<sub>18</sub>H<sub>19</sub>NNaO<sub>3</sub>S [M+Na]<sup>+</sup>: 352.0983; found: 352.0988.

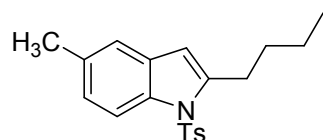

Yield: 86%.

**<sup>1</sup>H NMR** (400 MHz, CDCl<sub>3</sub>) δ 8.04 (d, J = 8.5 Hz, 1H), 7.60 (dd, J = 8.5, 2.0 Hz, 2H), 7.21 - 7.12 (m, 3H), 7.06 (dd, J = 8.5, 1.8 Hz, 1H), 6.33 - 6.27 (m, 1H), 3.01 - 2.92 (m, 2H), 2.39 (s, 3H), 2.32 (s, 3H), 1.78 - 1.66 (m, 2H), 1.44 (h, J = 7.4 Hz, 2H), 0.96 (t, J = 7.4 Hz, 3H).

**<sup>13</sup>C NMR** (101 MHz, CDCl<sub>3</sub>) δ 144.44, 142.57, 136.27, 135.44, 132.99, 130.11, 129.72, 126.22, 125.07, 120.02, 114.53, 108.53, 31.02, 28.78, 22.48, 21.53, 21.21, 13.94.

**HRMS-ESI** calculated for C<sub>20</sub>H<sub>24</sub>NO<sub>2</sub>S [M+H]<sup>+</sup>: 342.1528; found: 342.1521.

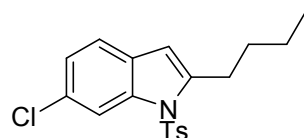

Yield: 82%.

**<sup>1</sup>H NMR** (400 MHz, CDCl<sub>3</sub>) δ 8.15 (d, J = 1.7 Hz, 1H), 7.55 (d, J = 8.1 Hz, 2H), 7.24 (d, J = 8.3 Hz, 1H), 7.13 (dd, J = 13.7, 8.2 Hz, 3H), 6.27 (s, 1H), 2.88 (t, J = 7.7 Hz, 2H), 2.29 (s, 3H), 1.64 (p, J = 7.6 Hz, 2H), 1.37 (h, J = 7.4 Hz, 2H), 0.89 (t, J = 7.3 Hz, 3H).

$^{13}\text{C}$  NMR (101 MHz,  $\text{CDCl}_3$ )  $\delta$  144.93, 143.24, 137.52, 136.05, 129.92, 129.64, 128.28, 126.29, 124.00, 120.66, 114.98, 108.02, 30.82, 28.61, 22.44, 21.56, 13.88.

HRMS-ESI calculated for  $\text{C}_{19}\text{H}_{21}\text{ClNO}_2\text{S}$   $[\text{M}+\text{H}]^+$ : 362.0982; found: 362.0988.

#### 4. References

- (1) Li, Y.; Gryn'ova, G.; Saenz, F.; Jeanbourquin, X.; Sivula, K.; Corminboeuf, C.; Waser, J. *Chem. Eur. J.* **2017**, *23*, 8058–8065.
- (2) Fischer, J.; Savage, G. P.; Coster, M. J. *Org. Lett.* **2011**, *13*, 3376–3379.
- (3) Liu, J.; Liu, Y. *Org. Lett.* **2012**, *14*, 4742–4745.
- (4) Liu, Y.; Lu, T.; Tang, W.-F.; Gao, J. *RSC Adv.* **2018**, *8*, 28637–28641.
- (5) Qiu, Y.-F.; Ye, Y.-Y.; Song, X.-R.; Zhu, X.-Y.; Yang, F.; Song, B.; Wang, J.; Hua, H.-L.; He, Y.-T.; Han, Y.-P.; Liu, X.-Y.; Liang, Y.-M. *Chem. Eur. J.* **2015**, *21*, 3480–3487.
- (6) Wang, Q.; Jiang, Y.; Sun, R.; Tang, X.-Y.; Shi, M. *Chem. Eur. J.* **2016**, *22*, 14739–14745.
- (7) Chong, E.; Blum, S. A. *J. Am. Chem. Soc.* **2015**, *137*, 10144–10147.
- (8) Liu, J.; Xie, X.; Liu, Y. *Chem. Commun.* **2013**, *49*, 11794–11796.
- (9) Inamoto, K.; Asano, M.; Nakamura, Y.; Yonemoto, M.; Kondo, Y. *Org. Lett.* **2012**, *14*, 2622–2625.
- (10) Acerbi, A.; Carfagna, C.; Costa, M.; Mancuso, R.; Gabriele, B.; Della Ca', N. *Chem. Eur. J.* **2018**, *24*, 4835–4840.
- (11) Hu, Z.; Tong, X.; Liu, G. *Org. Lett.* **2016**, *18*, 2058–2061.

#### 5. $^1\text{H}$ NMR and $^{13}\text{C}$ NMR Spectra



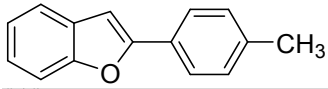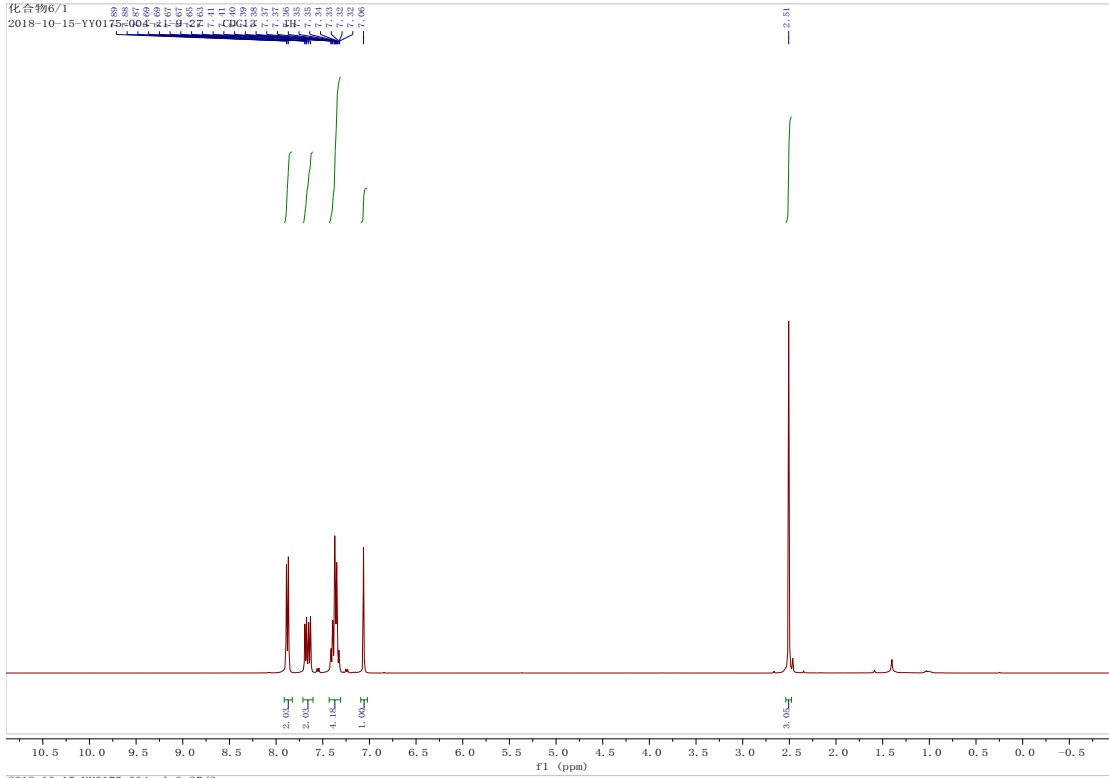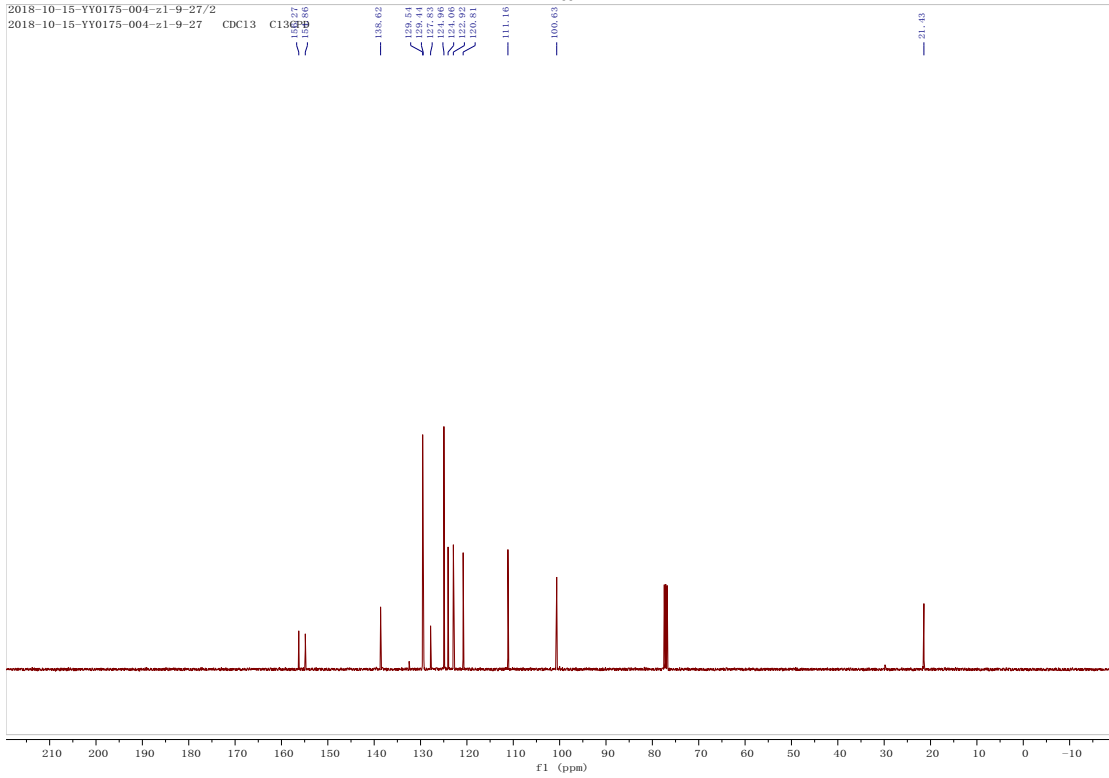



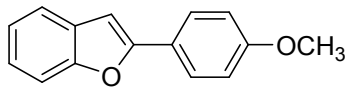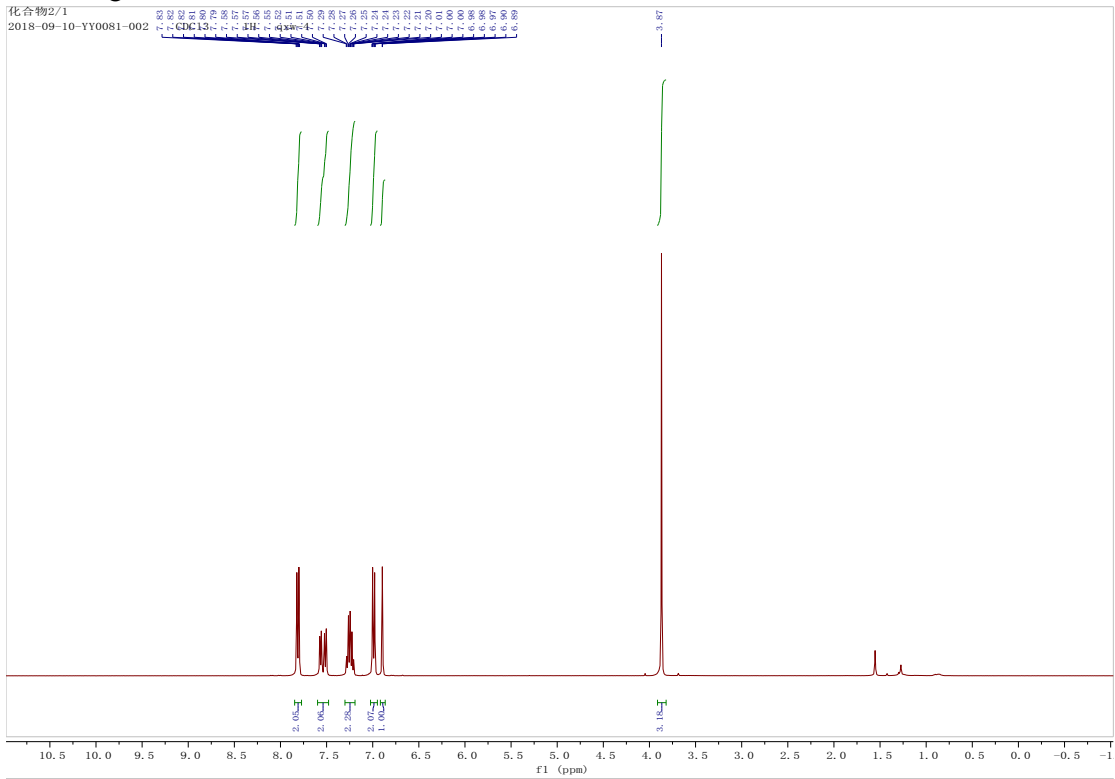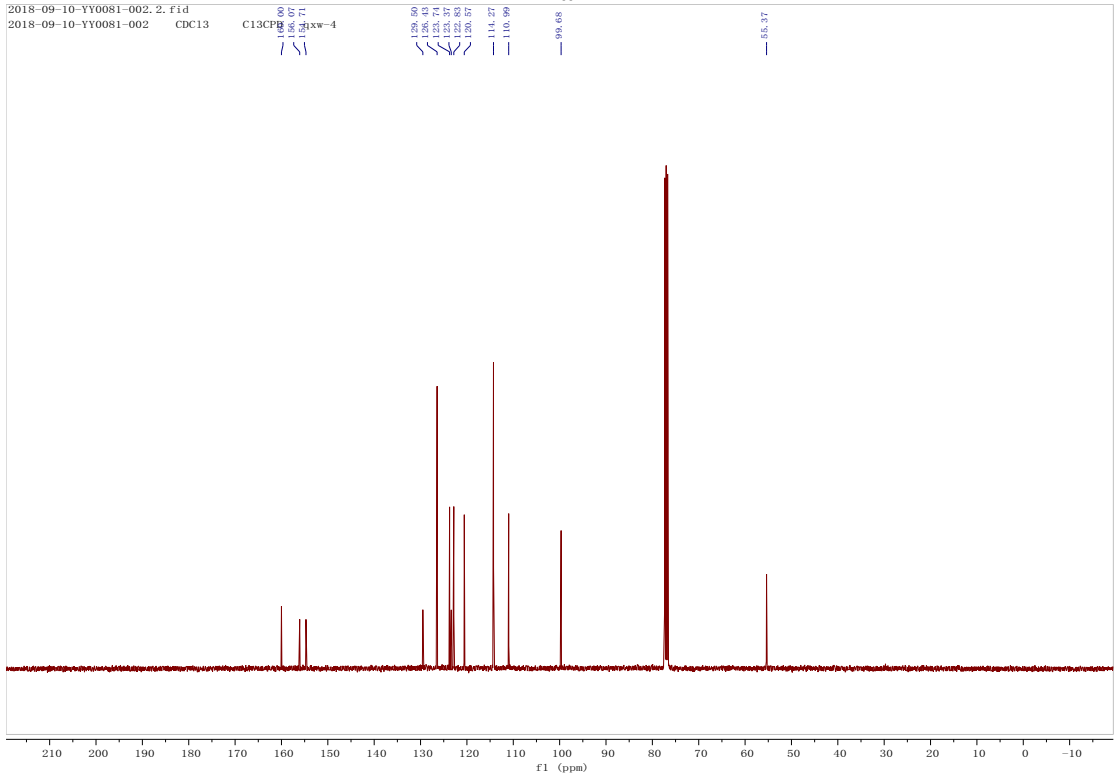

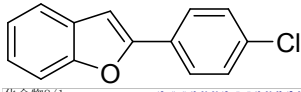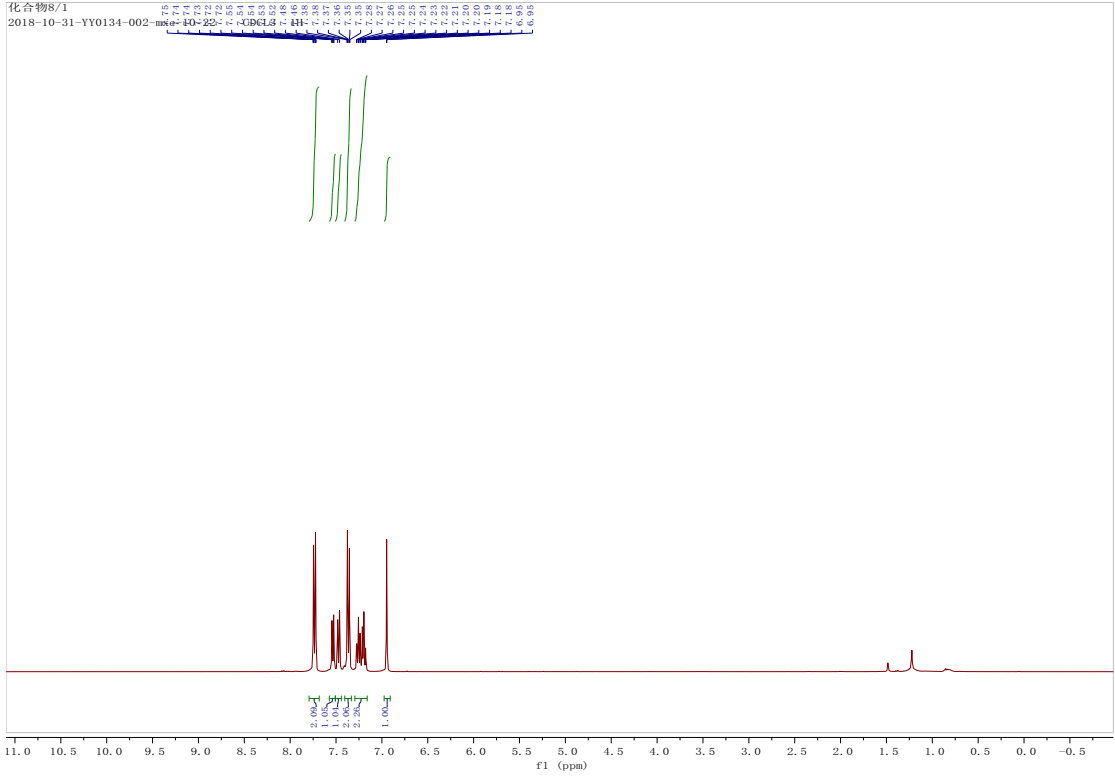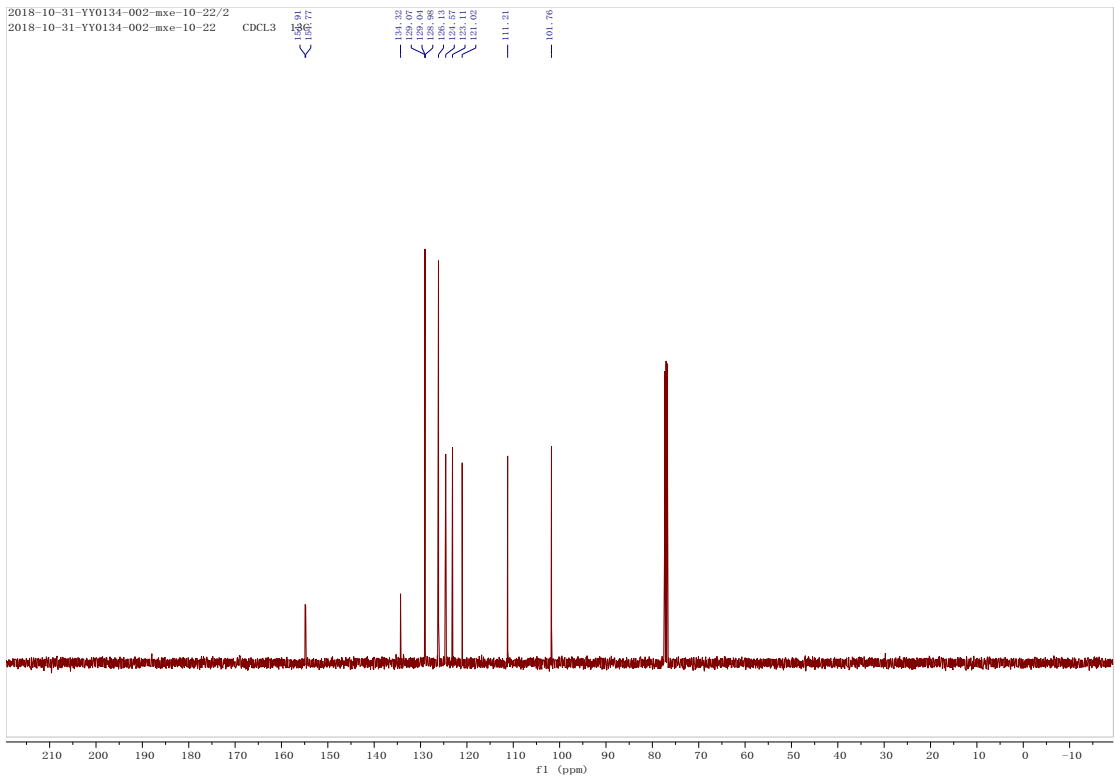



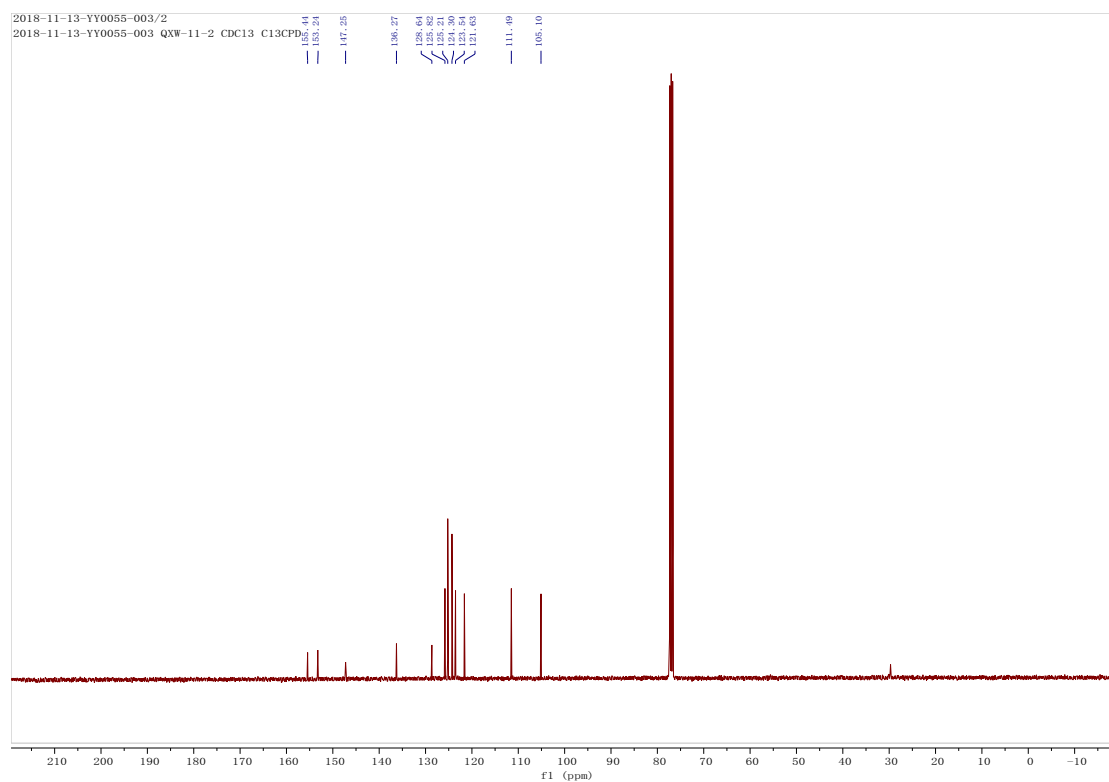





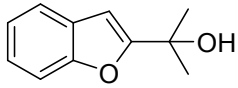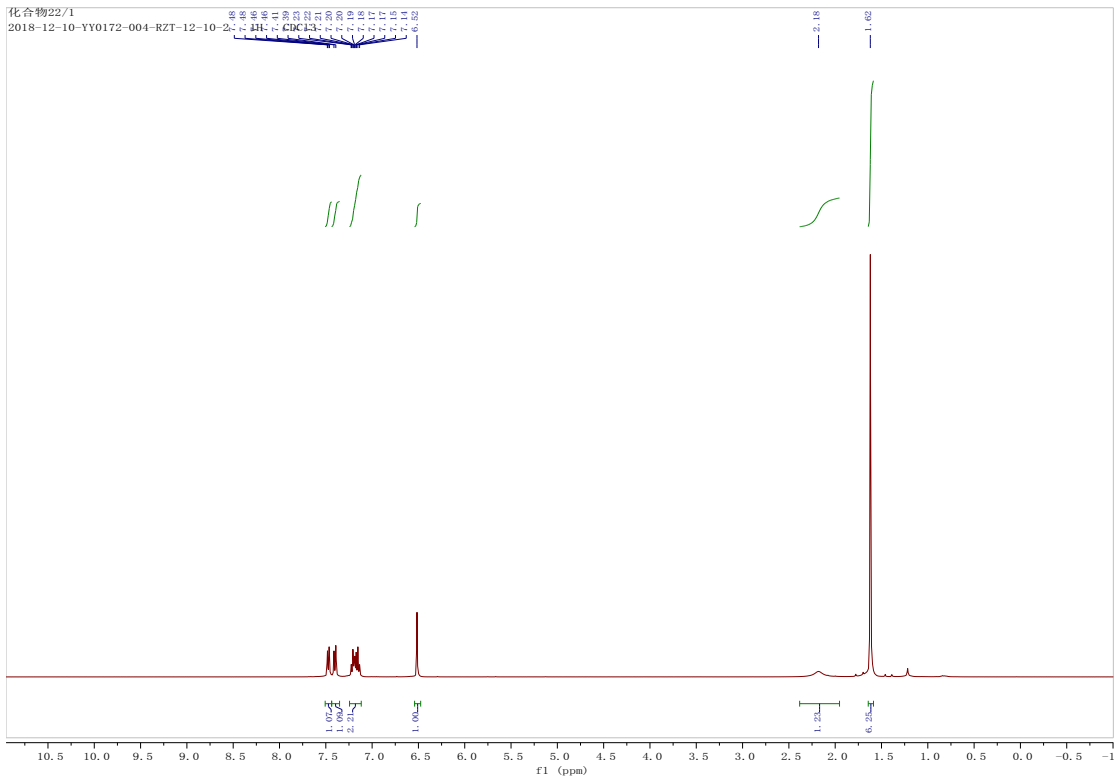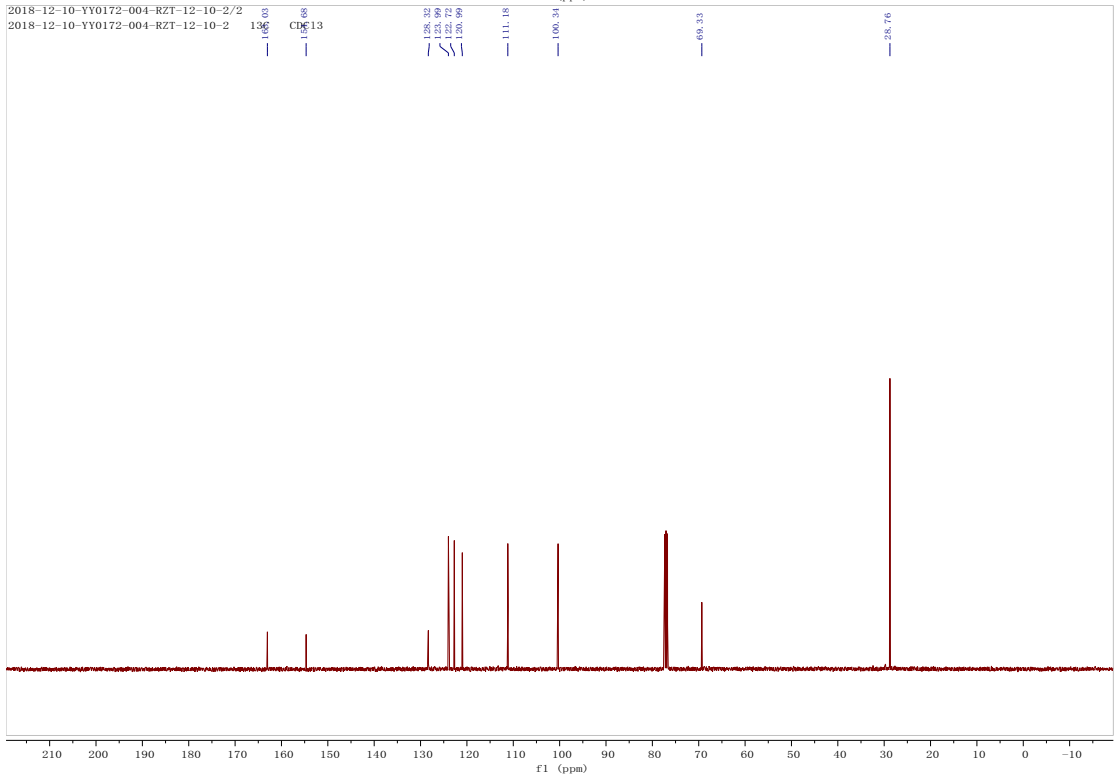

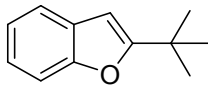

化合物23/1  
2018-12-10-YY0172-006-skh-12-6

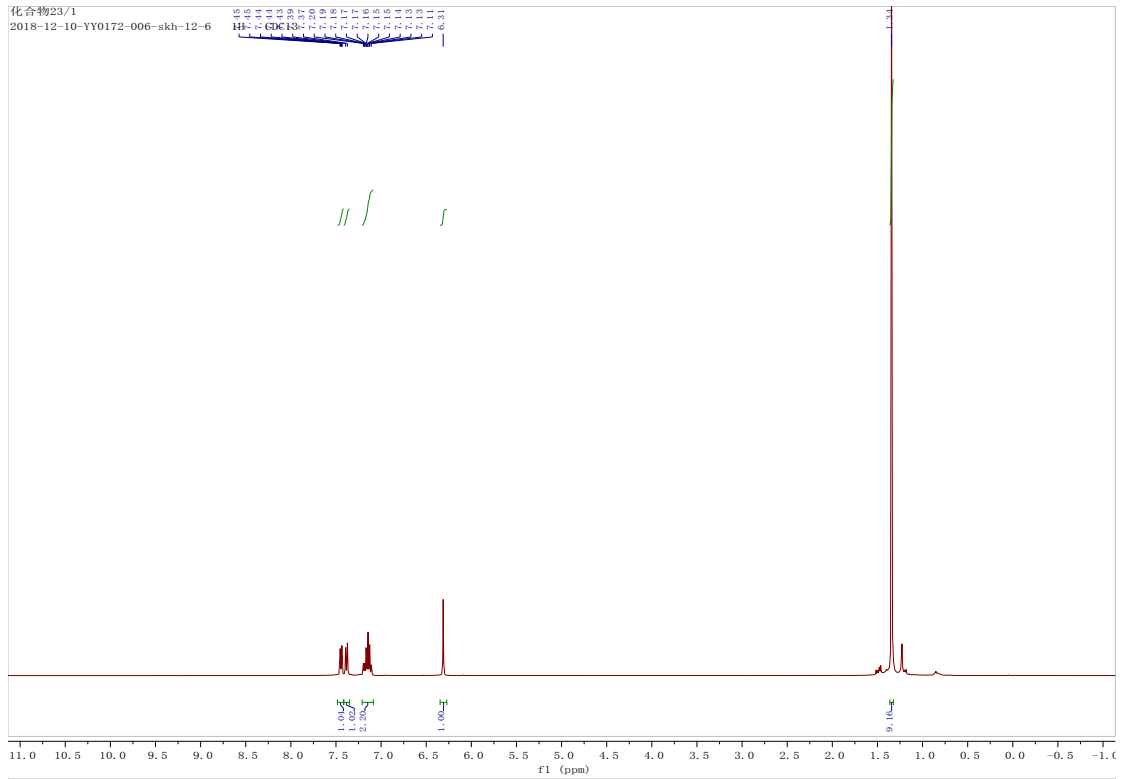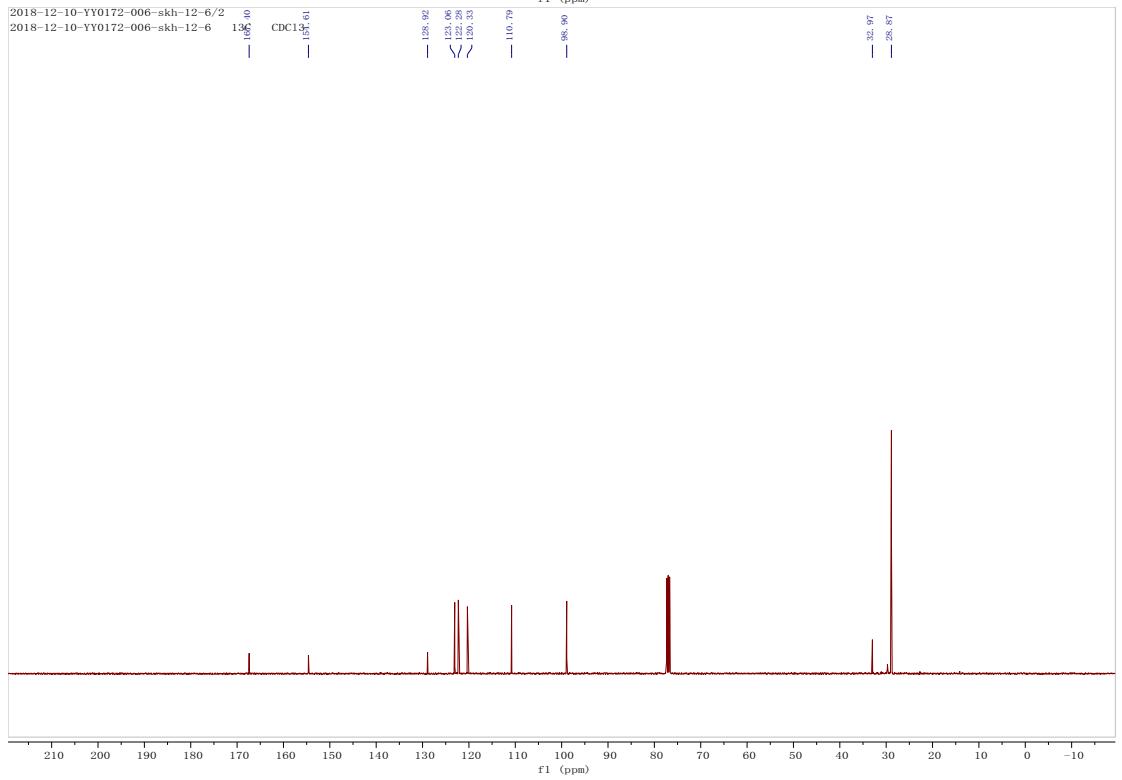



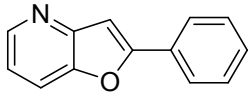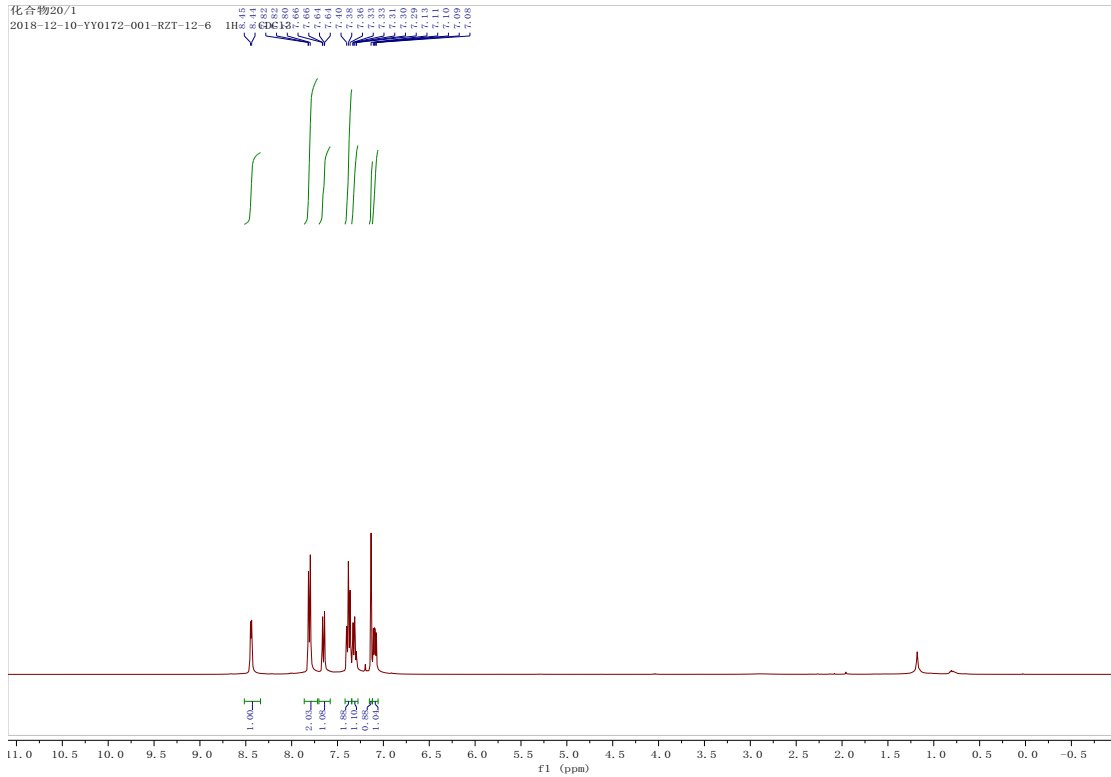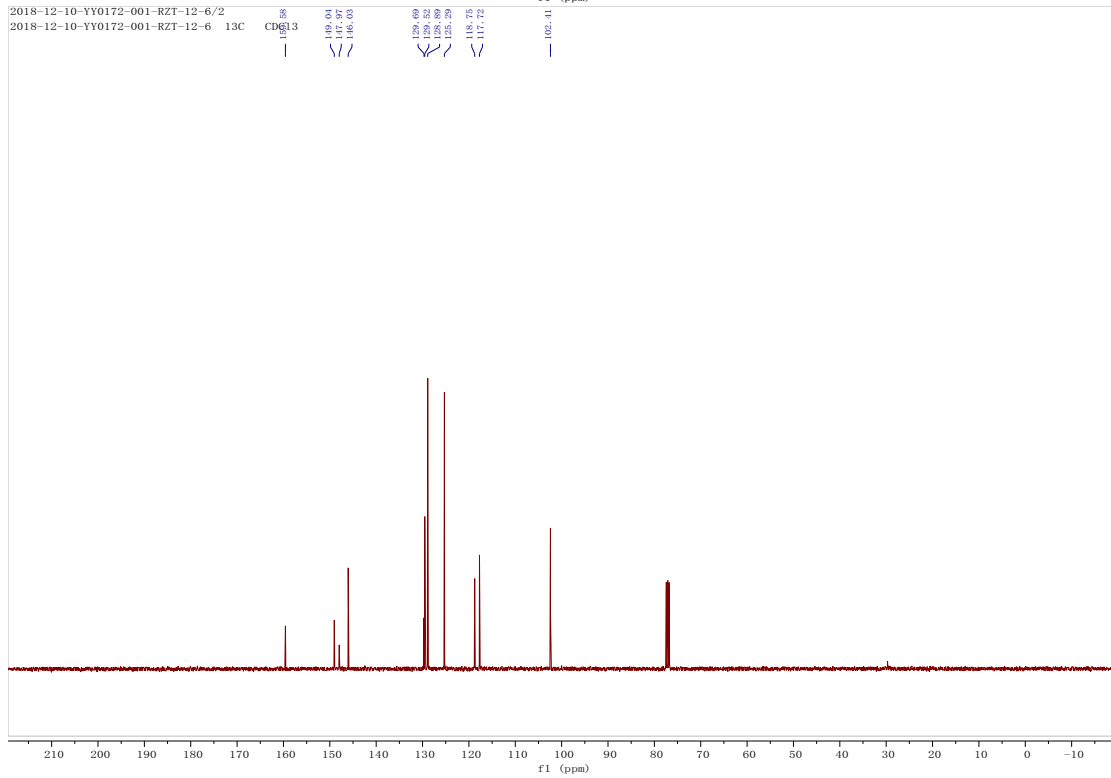

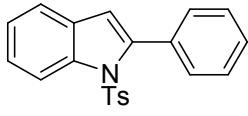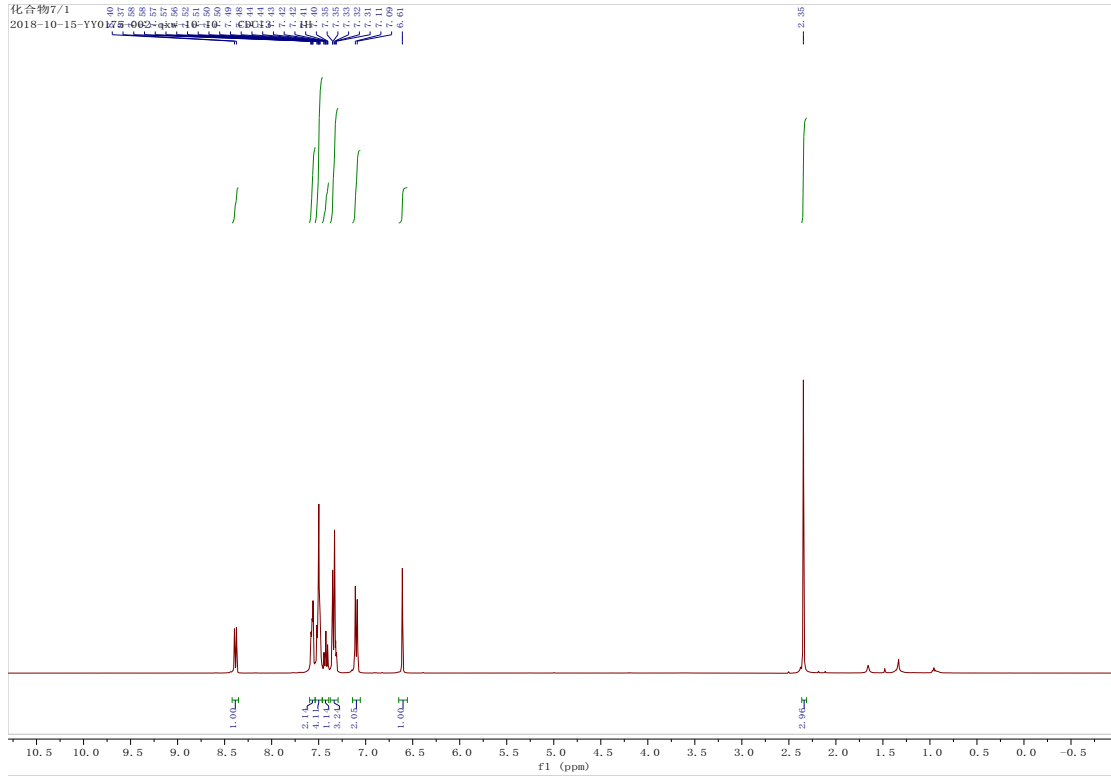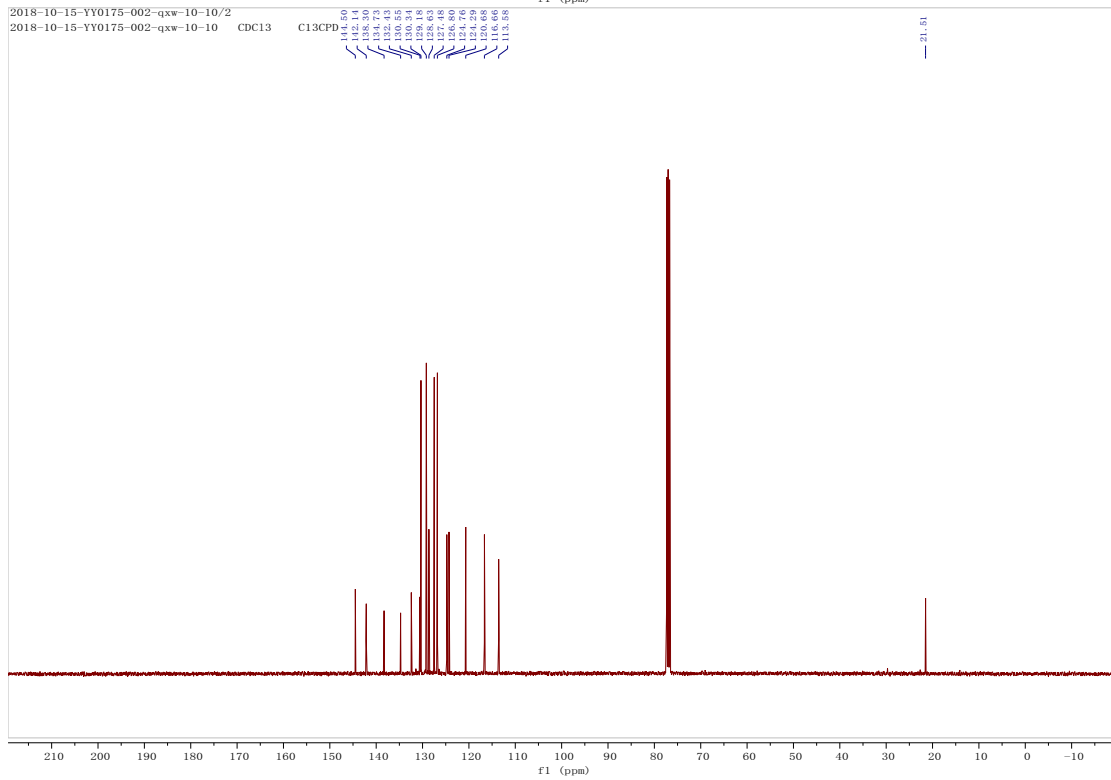

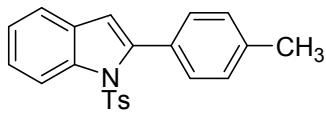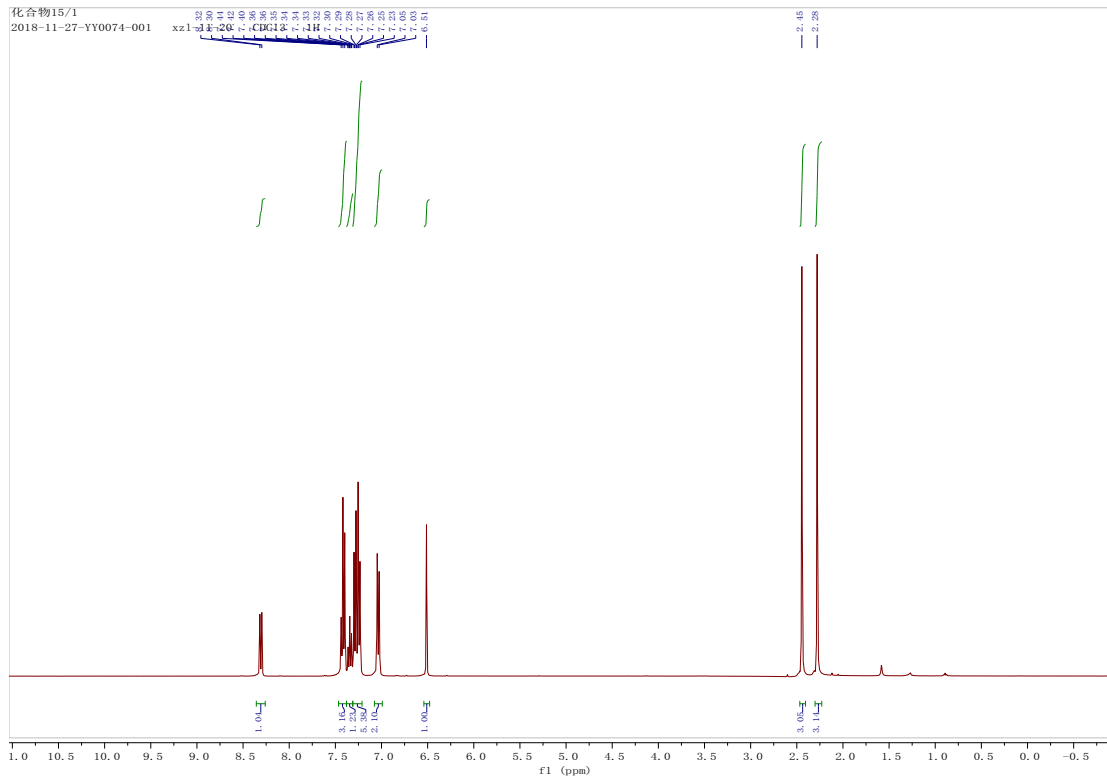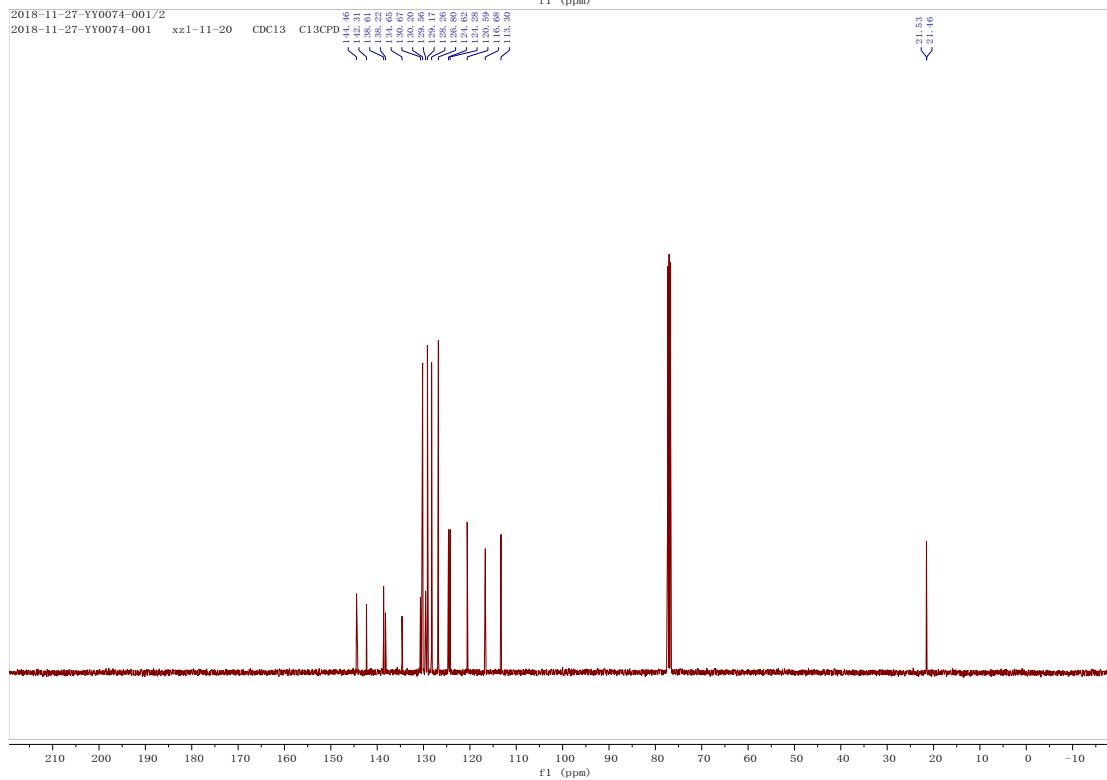

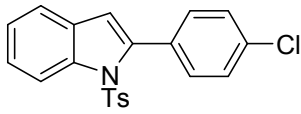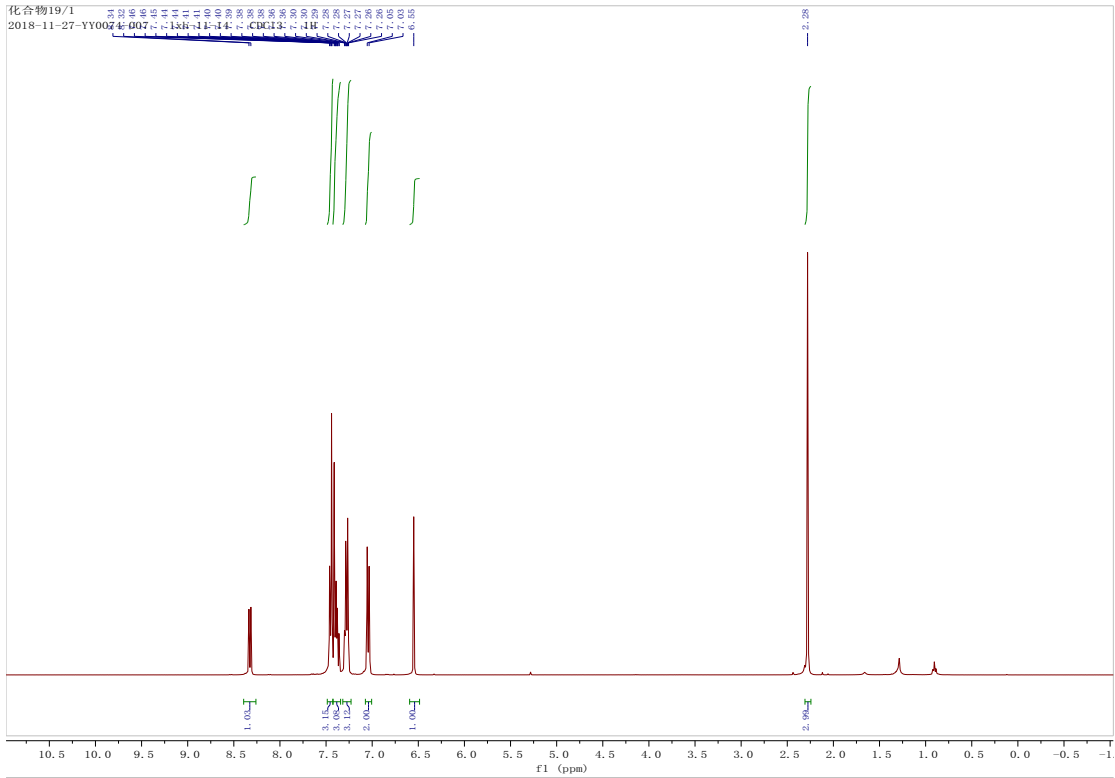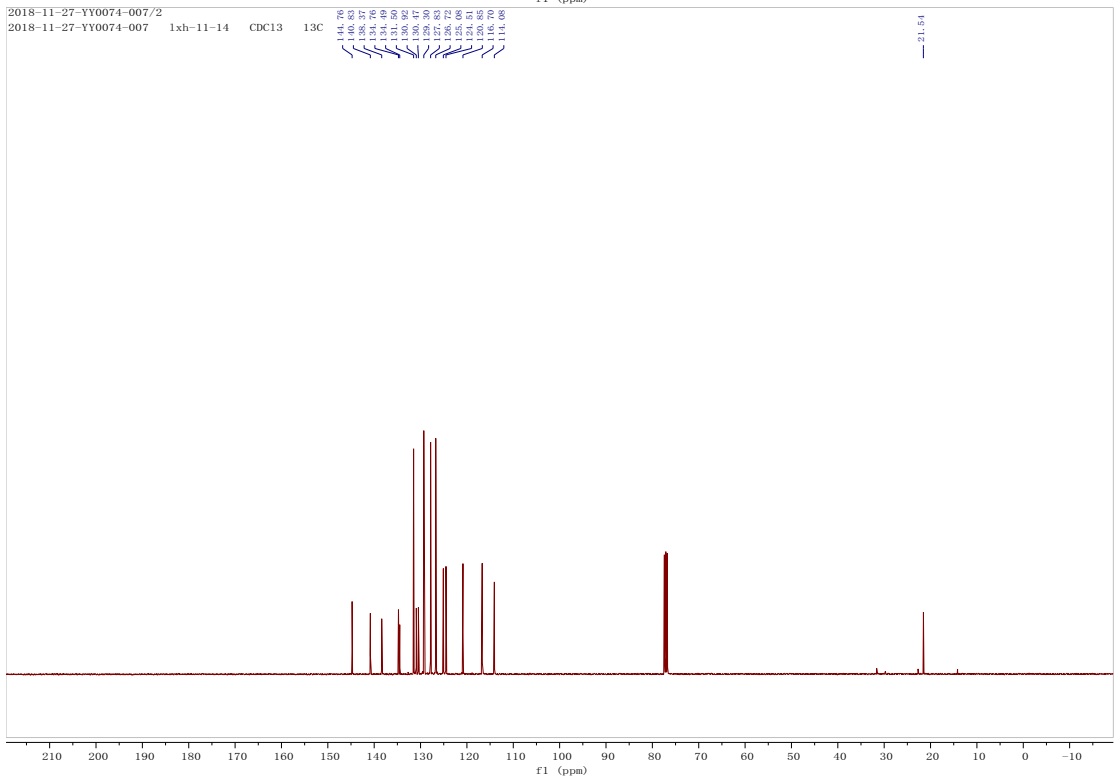



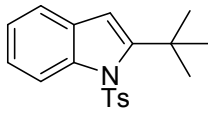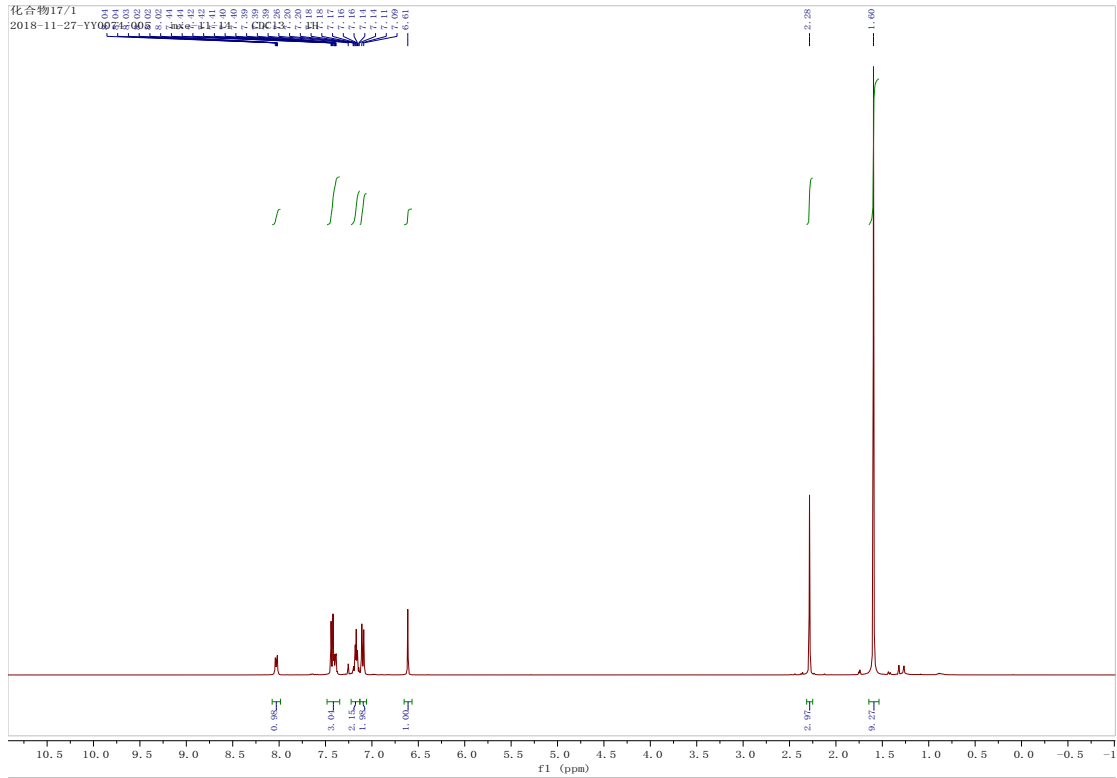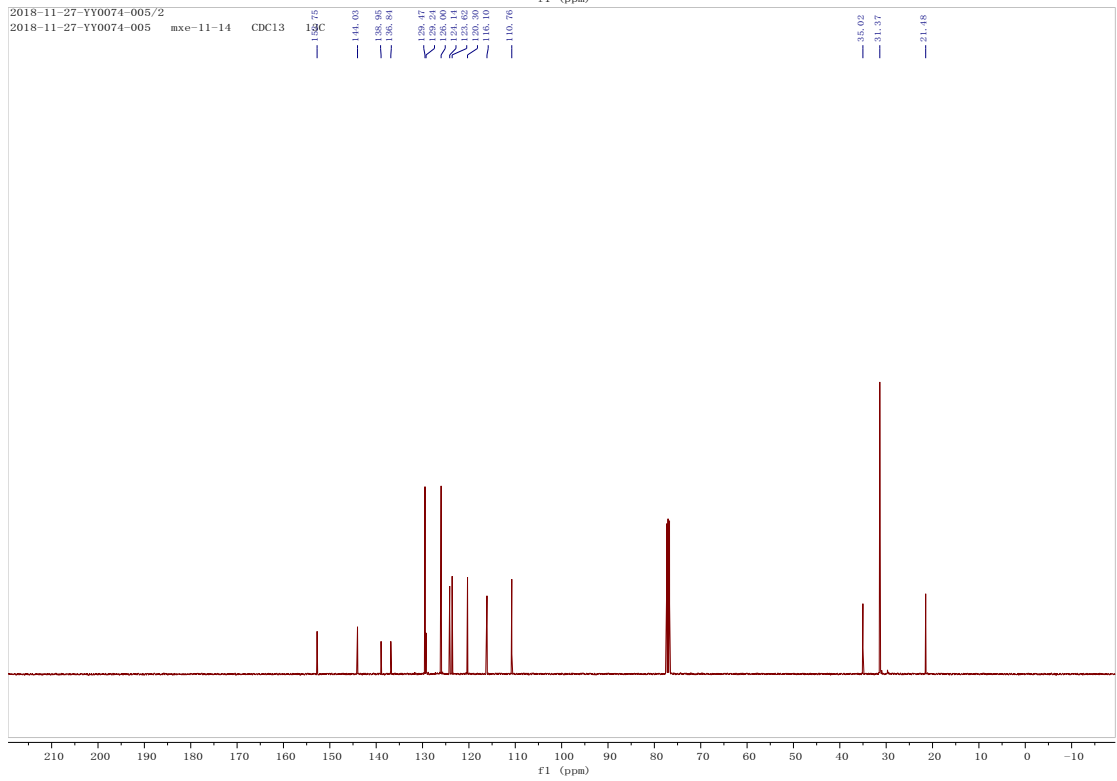

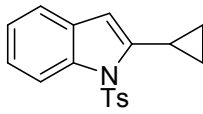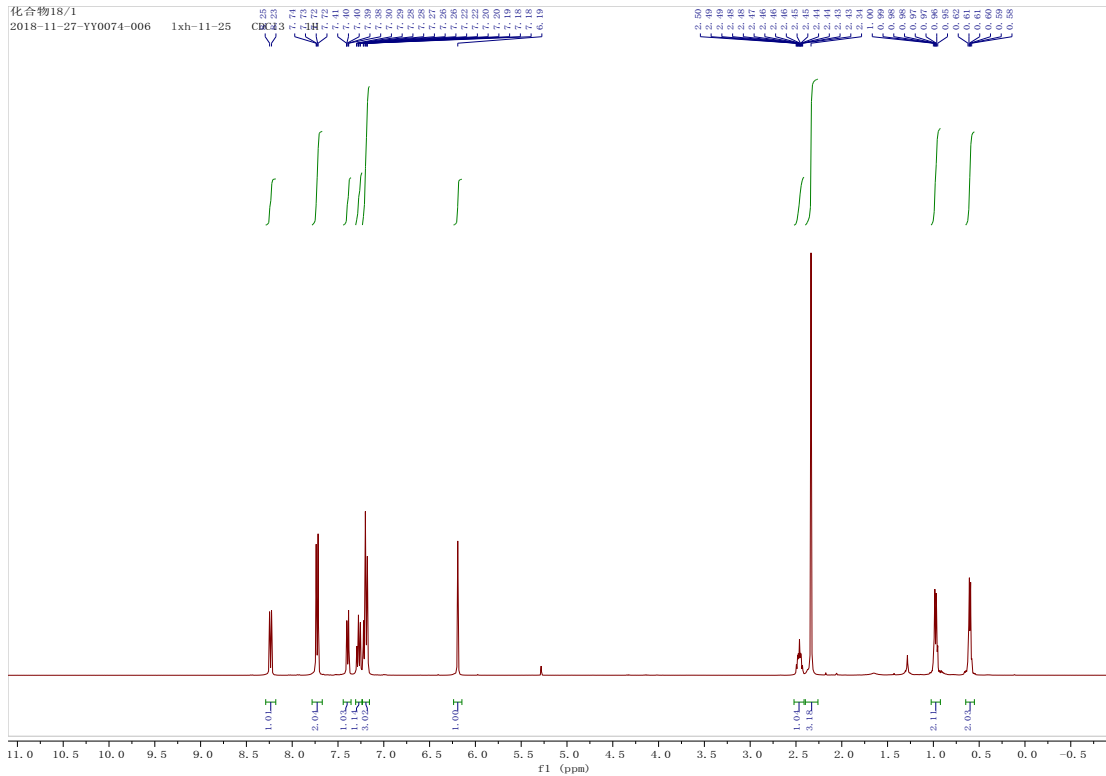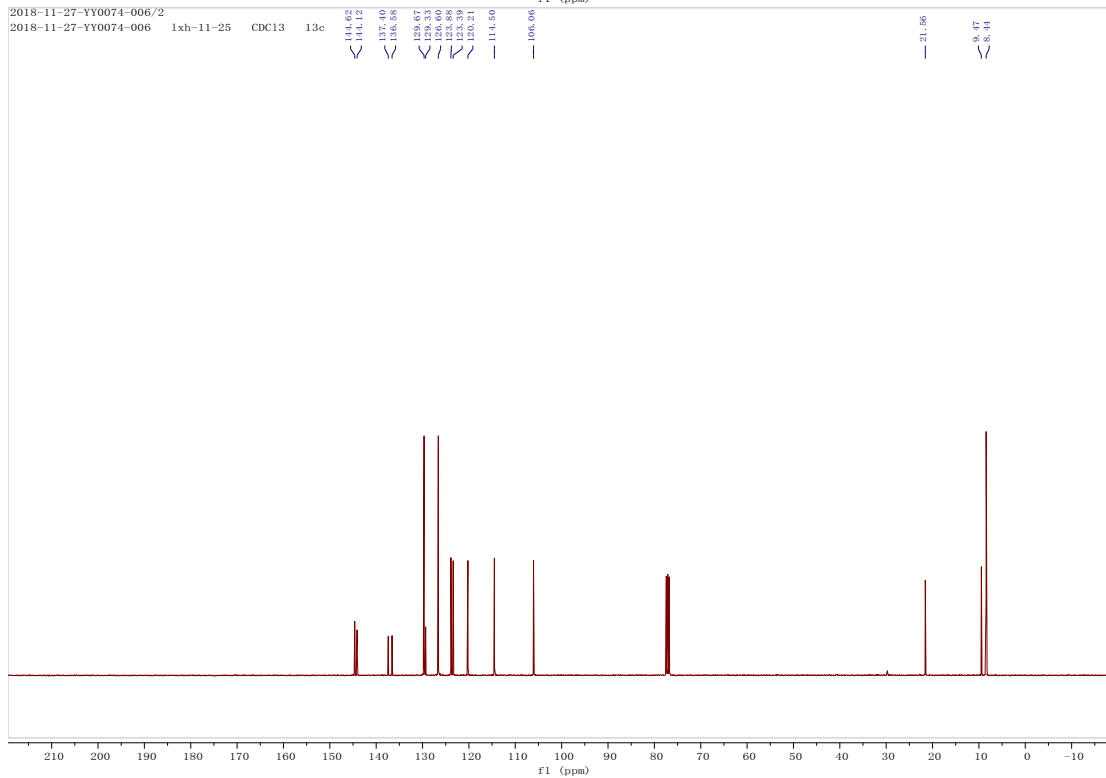

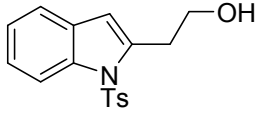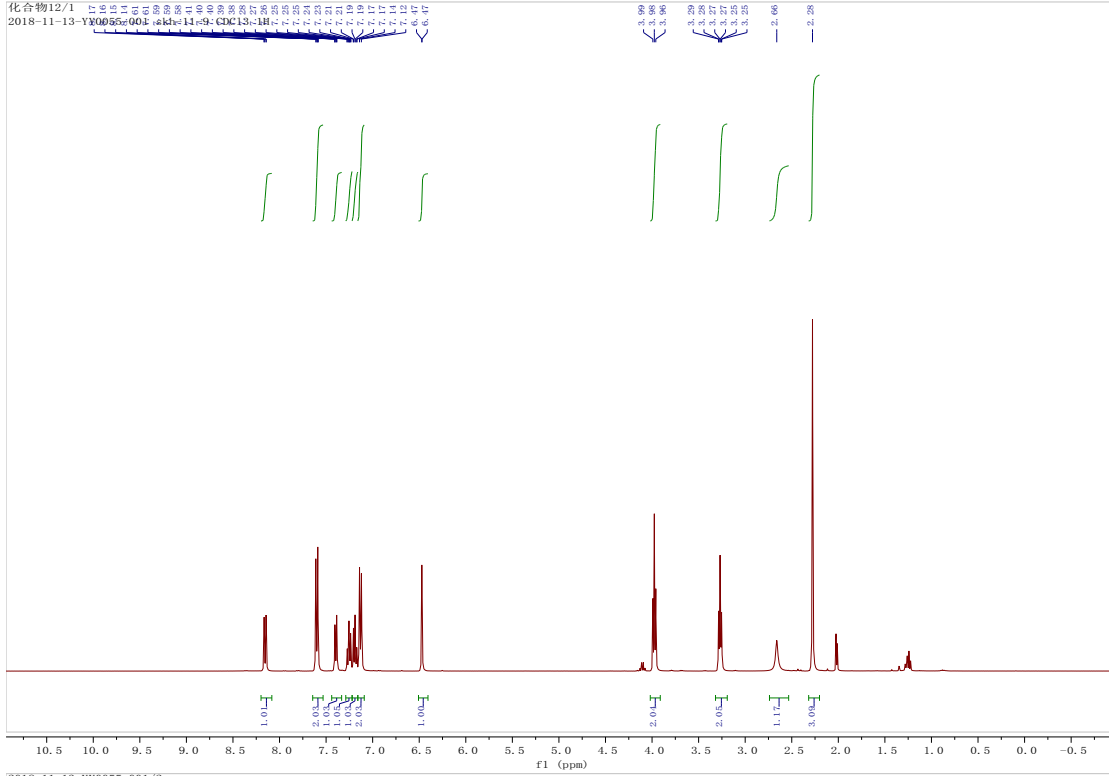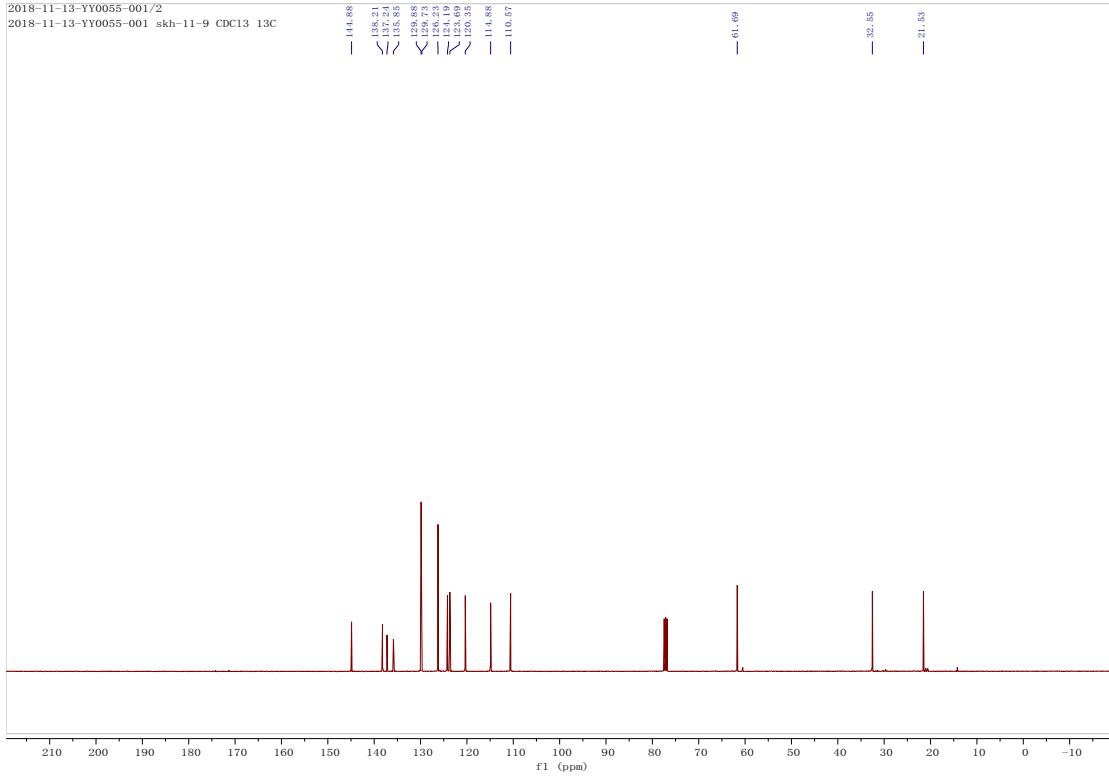



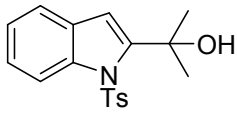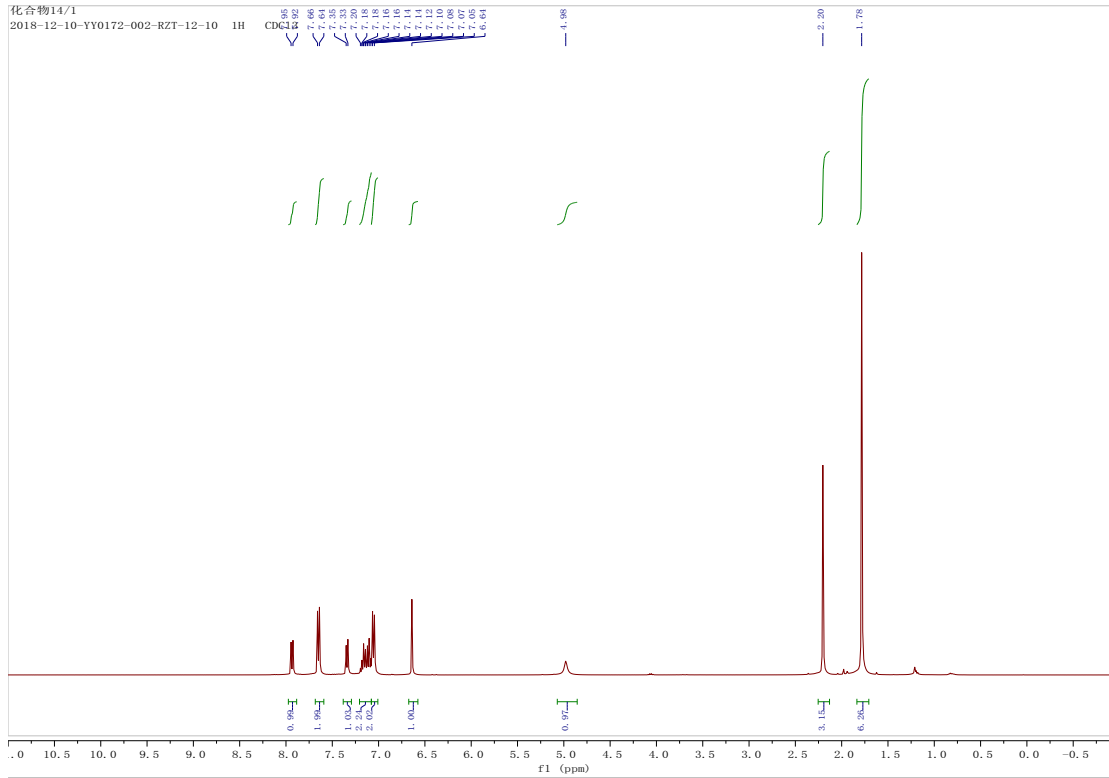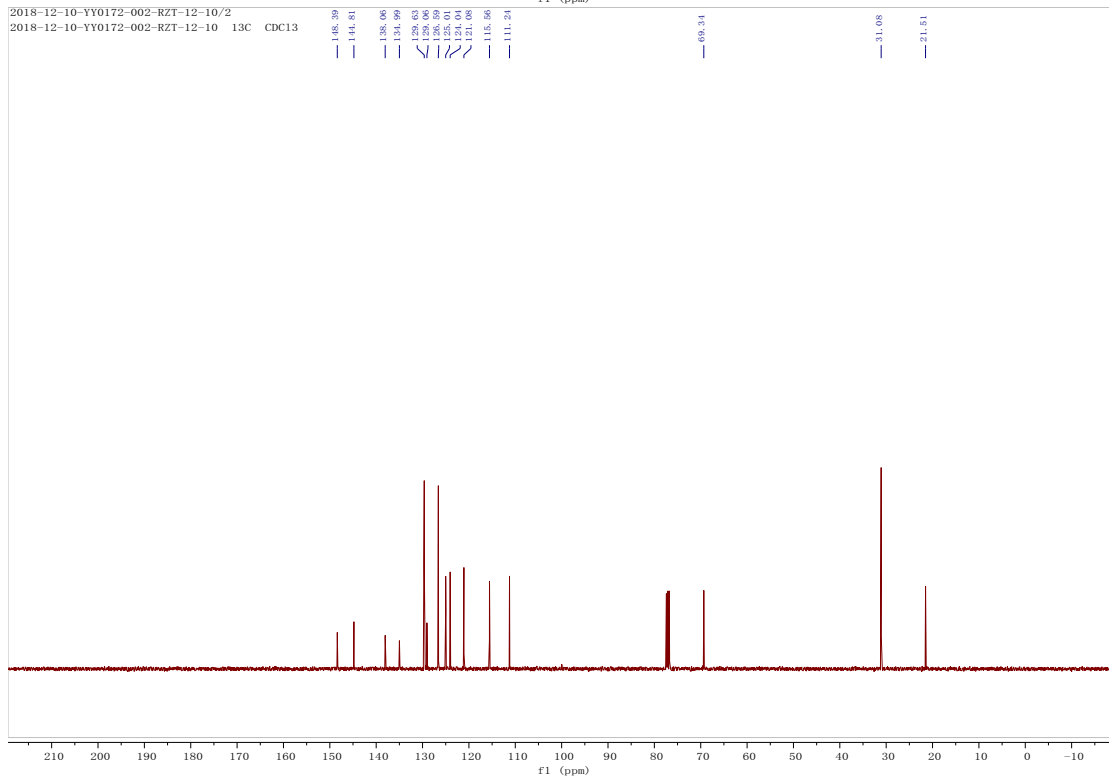

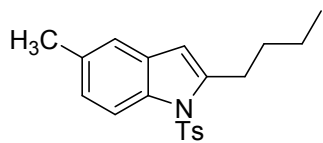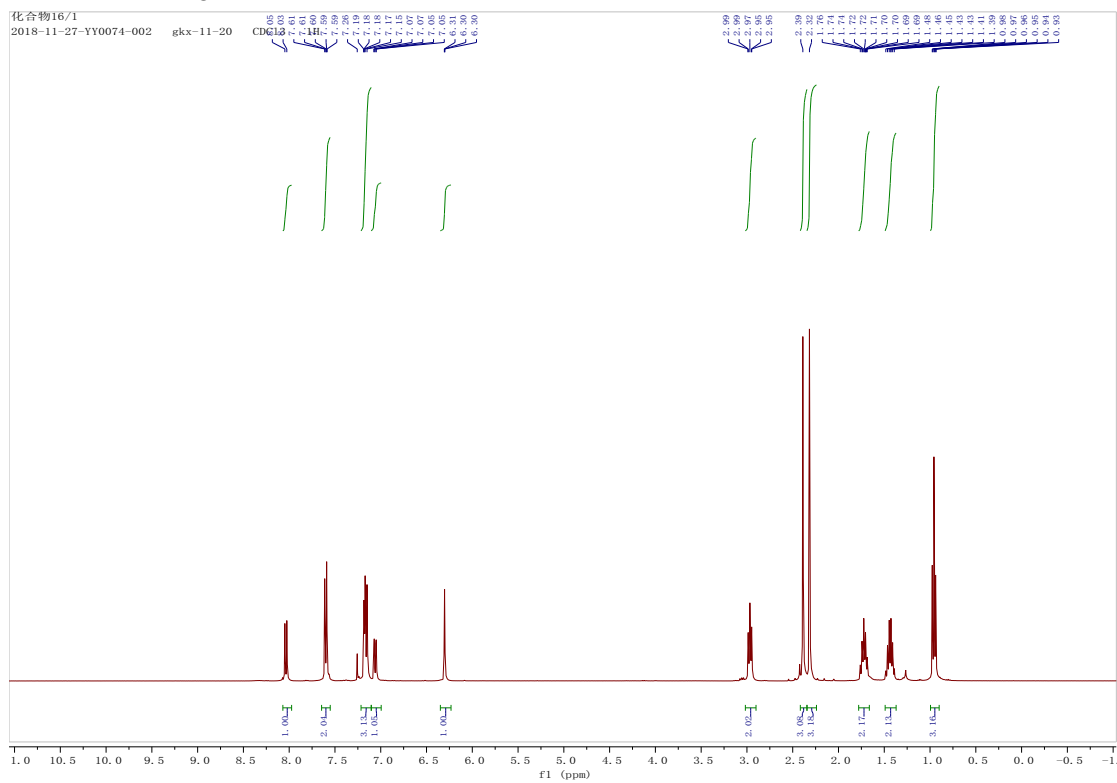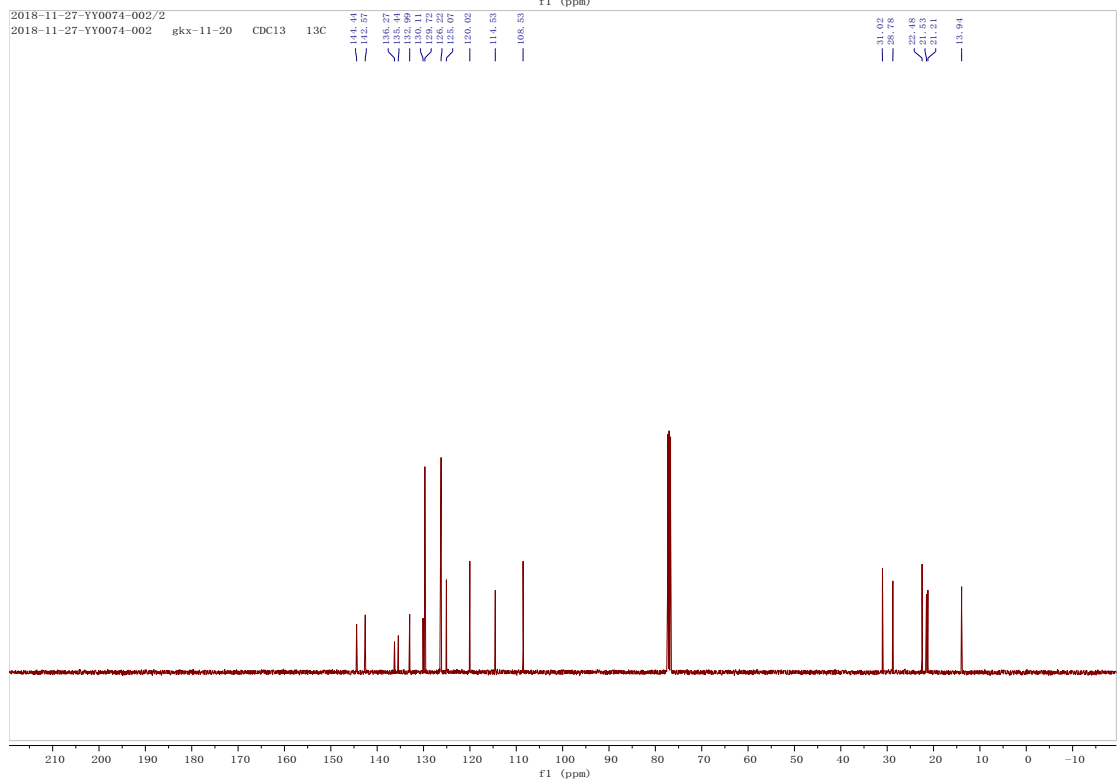

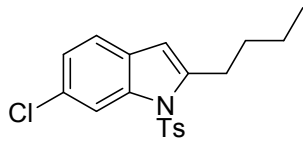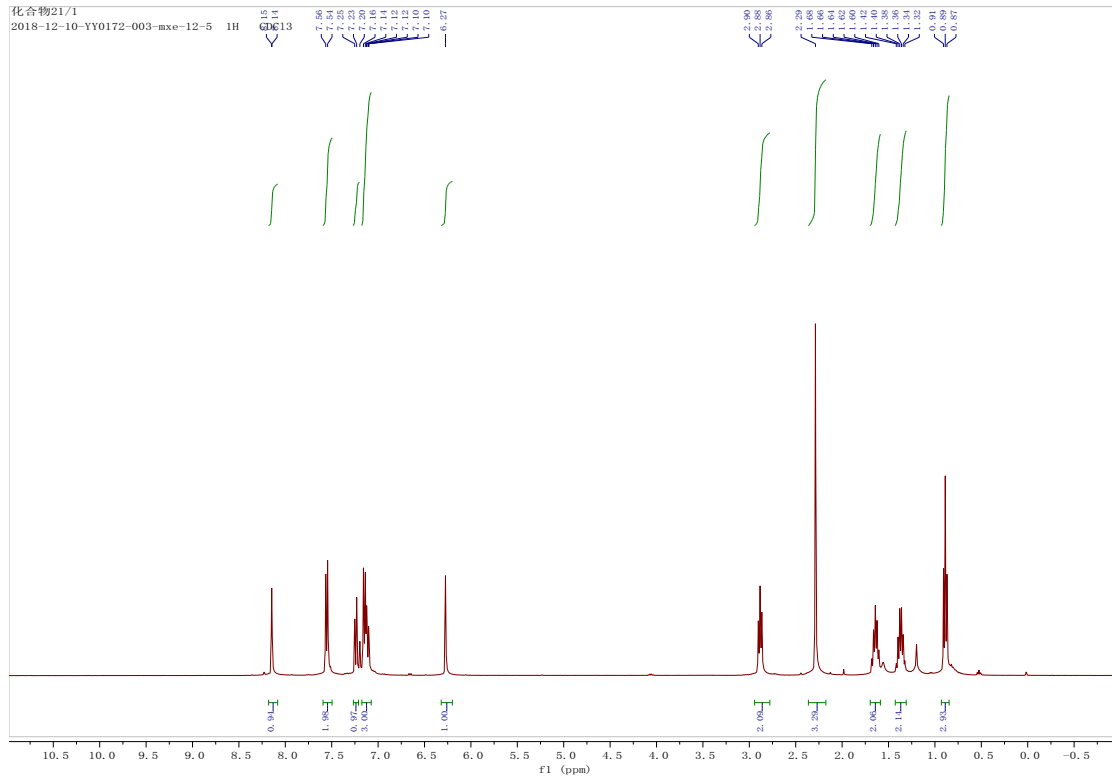

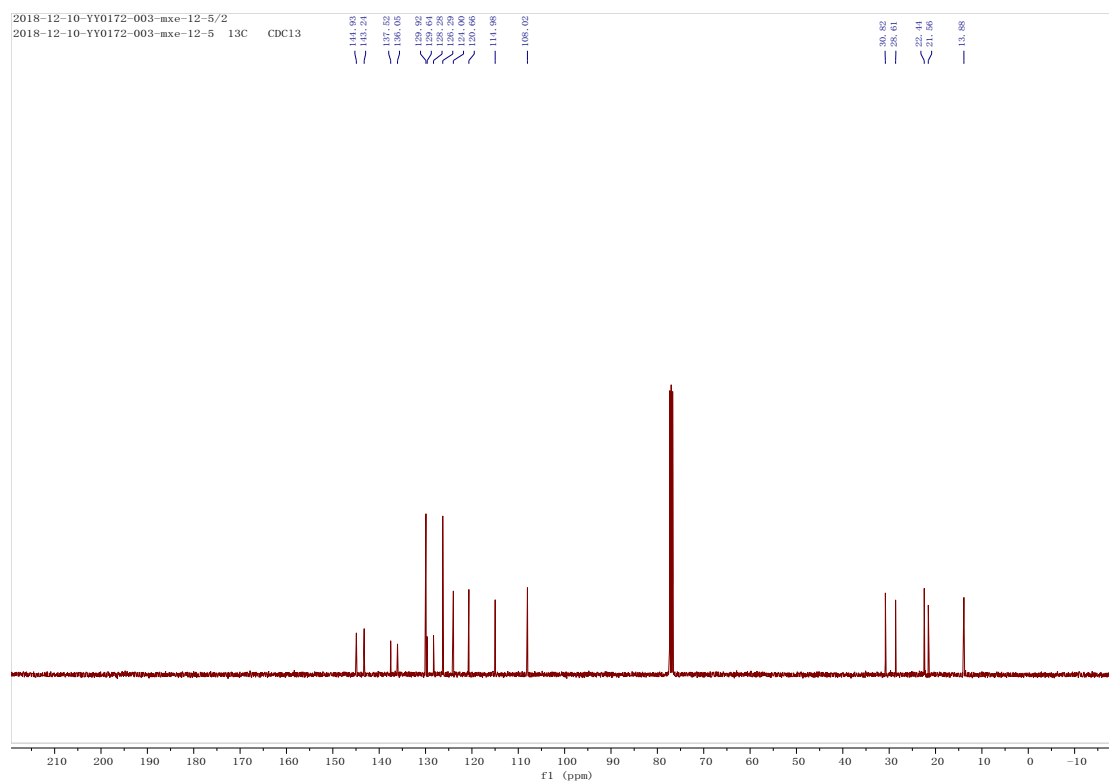

Supplement: c9ra01260e1.pdf [file c9ra01260e1.pdf]
